# Supplementary material for: Inner membrane complex proteomics reveals a palmitoylation regulation critical for intraerythrocytic development of malaria parasite
Source: eLife. 2022 Jul 1;11:e77447. doi: 10.7554/eLife.77447 (PMC9293000; doi:10.7554/eLife.77447)
Supplement: Figure 1—figure supplement 1—source data 1. [file elife-77447-fig1-figsupp1-data1.xls]

## Sheet: sheet1
Figure 1-figure supplement 1B	Immunoblot of the HA-tagged ligases episomally expressed in the asexual blood stages of the P. yoelii.
White boxes indicate the cropped protein band
