# Supplementary material for: Inner membrane complex proteomics reveals a palmitoylation regulation critical for intraerythrocytic development of malaria parasite
Source: eLife. 2022 Jul 1;11:e77447. doi: 10.7554/eLife.77447 (PMC9293000; doi:10.7554/eLife.77447)
Supplement: Figure 1—figure supplement 1—source data 2. [file elife-77447-fig1-figsupp1-data2.xls]

## Sheet: sheet1
Figure 1-figure supplement 1C	Streptavidin blot detecting the biotinylated proteins from the wildtype, BioID or TurboID-expressing parasites incubated with exogenous biotin for different time (0, 0.25, 1, 3, and 18 h) at 37°C.
White boxes indicate the cropped protein band
