# Supplementary material for: Inner membrane complex proteomics reveals a palmitoylation regulation critical for intraerythrocytic development of malaria parasite
Source: eLife. 2022 Jul 1;11:e77447. doi: 10.7554/eLife.77447 (PMC9293000; doi:10.7554/eLife.77447)
Supplement: Figure 1—figure supplement 1—source data 3. [file elife-77447-fig1-figsupp1-data3.xls]

## Sheet: sheet1
Figure 1-figure supplement 1D	Streptavidin dot blot of the biotinylated proteins from total lysate of parasites in C.
	White boxes indicate the cropped protein band
