# Supplementary material for: Inner membrane complex proteomics reveals a palmitoylation regulation critical for intraerythrocytic development of malaria parasite
Source: eLife. 2022 Jul 1;11:e77447. doi: 10.7554/eLife.77447 (PMC9293000; doi:10.7554/eLife.77447)
Supplement: Figure 1—figure supplement 1—source data 4. [file elife-77447-fig1-figsupp1-data4.xls]

## Sheet: sheet1
Figure 1-figure supplement 1D	Quantification of streptavidin dot blot of the biotinylated proteins
																multiple comparison	Significantly different	P value summary
		wildtype		BioID					TurboID						test (Tukey’s multiple comparison)	wt-0 vs. wt-18	No	ns
	time	0h	18h	0h	15min	1h	3h	18h	0h	15min	1h	3h	18h			wt-0 vs. BioID-0	No	ns
replicate: (N=3)	Relative dot intensity	1	1.08881	1.08793	1.2377	1.22801	2.24353	2.90037	1.18199	2.3394	2.87218	3.09295	2.75279			wt-0 vs. BioID-15'	No	ns
		1	0.896355	1.02454	1.03977	1.02561	2.25097	2.44519	1.11886	2.69827	2.41147	2.70222	2.62206			wt-0 vs. BioID-1	No	ns
		1	1.0155	1.03072	1.04919	1.04925	1.84073	3.17422	1.11566	3.47465	3.68947	3.26569	3.89181			wt-0 vs. BioID-3	Yes	***
																wt-0 vs. BioID-18	Yes	****
																wt-0 vs. TbID-0	No	ns
																wt-0 vs. TbID-15'	Yes	****
																wt-0 vs. TbID-1	Yes	****
																wt-0 vs. TbID-3	Yes	****
																wt-0 vs. TbID-18	Yes	****
																wt-18 vs. BioID-0	No	ns
																wt-18 vs. BioID-15'	No	ns
																wt-18 vs. BioID-1	No	ns
																wt-18 vs. BioID-3	Yes	***
																wt-18 vs. BioID-18	Yes	****
																wt-18 vs. TbID-0	No	ns
																wt-18 vs. TbID-15'	Yes	****
																wt-18 vs. TbID-1	Yes	****
																wt-18 vs. TbID-3	Yes	****
																wt-18 vs. TbID-18	Yes	****
																BioID-0 vs. BioID-15'	No	ns
																BioID-0 vs. BioID-1	No	ns
																BioID-0 vs. BioID-3	Yes	**
																BioID-0 vs. BioID-18	Yes	****
																BioID-0 vs. TbID-0	No	ns
																BioID-0 vs. TbID-15'	Yes	****
																BioID-0 vs. TbID-1	Yes	****
																BioID-0 vs. TbID-3	Yes	****
																BioID-0 vs. TbID-18	Yes	****
																BioID-15' vs. BioID-1	No	ns
																BioID-15' vs. BioID-3	Yes	**
																BioID-15' vs. BioID-18	Yes	****
																BioID-15' vs. TbID-0	No	ns
																BioID-15' vs. TbID-15'	Yes	****
																BioID-15' vs. TbID-1	Yes	****
																BioID-15' vs. TbID-3	Yes	****
																BioID-15' vs. TbID-18	Yes	****
																BioID-1 vs. BioID-3	Yes	**
																BioID-1 vs. BioID-18	Yes	****
																BioID-1 vs. TbID-0	No	ns
																BioID-1 vs. TbID-15'	Yes	****
																BioID-1 vs. TbID-1	Yes	****
																BioID-1 vs. TbID-3	Yes	****
																BioID-1 vs. TbID-18	Yes	****
																BioID-3 vs. BioID-18	No	ns
																BioID-3 vs. TbID-0	Yes	**
																BioID-3 vs. TbID-15'	No	ns
																BioID-3 vs. TbID-1	No	ns
																BioID-3 vs. TbID-3	Yes	*
																BioID-3 vs. TbID-18	Yes	**
																BioID-18 vs. TbID-0	Yes	****
																BioID-18 vs. TbID-15'	No	ns
																BioID-18 vs. TbID-1	No	ns
																BioID-18 vs. TbID-3	No	ns
																BioID-18 vs. TbID-18	No	ns
																TbID-0 vs. TbID-15'	Yes	****
																TbID-0 vs. TbID-1	Yes	****
																TbID-0 vs. TbID-3	Yes	****
																TbID-0 vs. TbID-18	Yes	****
																TbID-15' vs. TbID-1	No	ns
																TbID-15' vs. TbID-3	No	ns
																TbID-15' vs. TbID-18	No	ns
																TbID-1 vs. TbID-3	No	ns
																TbID-1 vs. TbID-18	No	ns
																TbID-3 vs. TbID-18	No	ns
