# Supplementary material for: Inner membrane complex proteomics reveals a palmitoylation regulation critical for intraerythrocytic development of malaria parasite
Source: eLife. 2022 Jul 1;11:e77447. doi: 10.7554/eLife.77447 (PMC9293000; doi:10.7554/eLife.77447)
Supplement: Figure 1—figure supplement 1—source data 5. [file elife-77447-fig1-figsupp1-data5.xls]

## Sheet: sheet1
Figure 1-figure supplement 1F	Quantification of IFA signal intensity
	BioID				TurboID
	4℃	22℃	30℃	37℃	4℃	22℃	30℃	37℃
test-1	0.502465	2.00479	8.87885	9.26401	0.573281	7.87438	8.84575	10.528
test-2	0.56665	2.1035	8.7878	10.8623	0.449615	7.70931	8.92983	9.58233
test-3	0.436245	2.44732	7.65218	8.76744	0.433196	8.29927	8.81147	10.7357
