# Supplementary material for: Inner membrane complex proteomics reveals a palmitoylation regulation critical for intraerythrocytic development of malaria parasite
Source: eLife. 2022 Jul 1;11:e77447. doi: 10.7554/eLife.77447 (PMC9293000; doi:10.7554/eLife.77447)
Supplement: Figure 1—figure supplement 2—source data 2. [file elife-77447-fig1-figsupp2-data2.xls]

## Sheet: sheet1
Figure 1-figure supplement 2D	Streptavidin dot blot of biotinylated proteins in the EV, Tb-cyto, Tb-IMC expressing schizonts incubated with or without 100 µM biotin.
						EV
						Tb-Cyto
						Tb-IMC
		biotin	(-)	(+)
	White boxes indicate the cropped protein band
