# Supplementary material for: Inner membrane complex proteomics reveals a palmitoylation regulation critical for intraerythrocytic development of malaria parasite
Source: eLife. 2022 Jul 1;11:e77447. doi: 10.7554/eLife.77447 (PMC9293000; doi:10.7554/eLife.77447)
Supplement: Figure 2—figure supplement 1—source data 1. [file elife-77447-fig2-figsupp1-data1.xls]

## Sheet: sheet1
Figure 2-figure supplement 1B	Diagnostic PCR of Tb-IMC interacting protein candidates
	White boxes indicate the cropped DNA band
