# Supplementary material for: Inner membrane complex proteomics reveals a palmitoylation regulation critical for intraerythrocytic development of malaria parasite
Source: eLife. 2022 Jul 1;11:e77447. doi: 10.7554/eLife.77447 (PMC9293000; doi:10.7554/eLife.77447)
Supplement: Figure 2—figure supplement 2—source data 1. [file elife-77447-fig2-figsupp2-data1.xls]

## Sheet: sheet1
Figure 2-figure supplement 2A	Immunoblot of 21 IMC protein candidates in the schizonts of P. yoelii.
																White boxes indicate the cropped protein band
