# Supplementary material for: Inner membrane complex proteomics reveals a palmitoylation regulation critical for intraerythrocytic development of malaria parasite
Source: eLife. 2022 Jul 1;11:e77447. doi: 10.7554/eLife.77447 (PMC9293000; doi:10.7554/eLife.77447)
Supplement: Figure 4—figure supplement 1—source data 1. [file elife-77447-fig4-figsupp1-data1.xls]

## Sheet: sheet1
Figure 4-figure supplement 1D	Diagnostic PCR of gfp::dhhc2 parasite
			White boxes indicate the cropped DNA band
