# Supplementary material for: Inner membrane complex proteomics reveals a palmitoylation regulation critical for intraerythrocytic development of malaria parasite
Source: eLife. 2022 Jul 1;11:e77447. doi: 10.7554/eLife.77447 (PMC9293000; doi:10.7554/eLife.77447)
Supplement: Figure 4—source data 1. [file elife-77447-fig4-data1.xls]

## Sheet: sheet1
Figure 4A	RT-qPCR of transcripts for 11 dhhc (dhhc1- dhhc11) in schizonts
main
		dhhc1	dhhc2	dhhc3	dhhc4	dhhc5	dhhc6	dhhc7	dhhc8	dhhc9	dhhc10	dhhc11
replicate: (N=3)	1	0.00540729	0.0441022	0.0186979	0.0031777	0.00816387	0.0146389	0.0170502	0.00553796	0.0051059	0.00227286	0.00398377
	2	0.00462531	0.0466167	0.0172391	0.00430849	0.00781746	0.0129796	0.0172175	0.00665782	0.00572591	0.00212839	0.00445153
	3	0.00440483	0.0394175	0.0183998	0.00331148	0.0082428	0.0131137	0.017589	0.00455148	0.00528221	0.00232985	0.0068483
insert
		dhhc1	dhhc2	dhhc3	dhhc4	dhhc5	dhhc6	dhhc7	dhhc8	dhhc9	dhhc10	dhhc11
Py(RT-qPCR)		0.111522	1	0.407078	0.088502	0.185545	0.325894	0.406906	0.127392	0.127491	0.053265	0.117031
Pb(RNA-seq)		0.149688	1	0.365212	0.0773097	0.317742	0.243427	0.420982	0.316158	0.298987	0.0848634	0.266408
