# Supplementary material for: Inner membrane complex proteomics reveals a palmitoylation regulation critical for intraerythrocytic development of malaria parasite
Source: eLife. 2022 Jul 1;11:e77447. doi: 10.7554/eLife.77447 (PMC9293000; doi:10.7554/eLife.77447)
Supplement: Figure 4—source data 3. [file elife-77447-fig4-data3.xls]

## Sheet: sheet1
Figure 4C	Quantification of DHHC1 and DHHC2 intensity in immunoblot
		dhhc1	dhhc2
replicate: (N=3)	1	1	4.4658
	2	1	5.85884
	3	1	3.28994
Test (two-tailed)		0.0413232
