# Supplementary material for: Inner membrane complex proteomics reveals a palmitoylation regulation critical for intraerythrocytic development of malaria parasite
Source: eLife. 2022 Jul 1;11:e77447. doi: 10.7554/eLife.77447 (PMC9293000; doi:10.7554/eLife.77447)
Supplement: Figure 4—source data 4. [file elife-77447-fig4-data4.xls]

## Sheet: sheet1
Figure 4E	Solubility assay detected membrane association of DHHC2 in schizonts using different detergents.
		White boxes indicate the cropped protein band
