# Supplementary material for: Inner membrane complex proteomics reveals a palmitoylation regulation critical for intraerythrocytic development of malaria parasite
Source: eLife. 2022 Jul 1;11:e77447. doi: 10.7554/eLife.77447 (PMC9293000; doi:10.7554/eLife.77447)
Supplement: Figure 5—figure supplement 1—source data 2. [file elife-77447-fig5-figsupp1-data2.xls]

## Sheet: sheet1
Figure 5-figure supplement 1C	Immunoblot of fusion proteins DHHC1::mAID and mAID::DHHC2 in the schizonts of the Tir1, dhhc1::mAID and mAID::dhhc2 parasites treated with vehicle or IAA (1 mM) for 3 h
	White boxes indicate the cropped protein band
