# Supplementary material for: Inner membrane complex proteomics reveals a palmitoylation regulation critical for intraerythrocytic development of malaria parasite
Source: eLife. 2022 Jul 1;11:e77447. doi: 10.7554/eLife.77447 (PMC9293000; doi:10.7554/eLife.77447)
Supplement: Figure 5—figure supplement 1—source data 3. [file elife-77447-fig5-figsupp1-data3.xls]

## Sheet: Figure S6D
Figure 5-figure supplement 1D	Proliferation assessment of wildtype parasite in mice treated with IAA
	dpi	vehicle			IAA
	0	0	0	0	0	0	0
	1	0.5107	0.8792	0.7385	0.5688	0.7	0.4212
	2	3.5179	2.425	2.8651	2.7625	2.8125	3.0954
	3	3.4167	4.925	3.625	2.9643	3.3542	3.6208
	4	3.875	5.7443	4.6458	4.1172	3.7365	4.9167
	5	6.5852	6.2	5.2723	4.5223	5.5742	6.233
