# Supplementary material for: Inner membrane complex proteomics reveals a palmitoylation regulation critical for intraerythrocytic development of malaria parasite
Source: eLife. 2022 Jul 1;11:e77447. doi: 10.7554/eLife.77447 (PMC9293000; doi:10.7554/eLife.77447)
Supplement: Figure 5—figure supplement 1—source data 4. [file elife-77447-fig5-figsupp1-data4.xls]

## Sheet: sheet1
Figure 5-figure supplement 1E	IAA-induced degradation assessment of parasite mAID::DHHC2 protein in mice.
	White boxes indicate the cropped protein band
