# Supplementary material for: Inner membrane complex proteomics reveals a palmitoylation regulation critical for intraerythrocytic development of malaria parasite
Source: eLife. 2022 Jul 1;11:e77447. doi: 10.7554/eLife.77447 (PMC9293000; doi:10.7554/eLife.77447)
Supplement: Figure 5—figure supplement 2—source data 1. [file elife-77447-fig5-figsupp2-data1.xls]

## Sheet: sheet1
Figure 5-figure supplement 2B	The invasion efficiency of merozoite in the mice evaluated by blood smear
	strain:	Tir1		mAID::dhhc2
	treatment	vehicle	IAA	vehicle	IAA
		1.025	1.017	1.08	0.2135
		0.874	1.0563	1.0366	0.2751
		1.163	1.1822	1.0415	0.2065
	test (two-tailed)	0.543241		5.77232e-06
