# Supplementary material for: Inner membrane complex proteomics reveals a palmitoylation regulation critical for intraerythrocytic development of malaria parasite
Source: eLife. 2022 Jul 1;11:e77447. doi: 10.7554/eLife.77447 (PMC9293000; doi:10.7554/eLife.77447)
Supplement: Figure 5—figure supplement 2—source data 2. [file elife-77447-fig5-figsupp2-data2.xls]

## Sheet: sheet1
Figure 5-figure supplement 2C	The invasion efficiency of merozoite in the mice evaluated by flow cytometry
	strain:	Tir1		mAID::dhhc2
	treatment	vehicle	IAA	vehicle	IAA
		0.948113	1.0872	1.04908	0.53374
		0.90566	1.0896	1.03067	0.515337
		1.14623	1.30189	0.92024	0.47852
	test (two-tailed)	0.195446		0.000347942
