# Supplementary material for: Inner membrane complex proteomics reveals a palmitoylation regulation critical for intraerythrocytic development of malaria parasite
Source: eLife. 2022 Jul 1;11:e77447. doi: 10.7554/eLife.77447 (PMC9293000; doi:10.7554/eLife.77447)
Supplement: Figure 5—source data 1. [file elife-77447-fig5-data1.xls]

## Sheet: sheet1
Figure 5B	Tir1 and mAID-dhhc2 parasite proliferation in mice
	Tir1			mAID::dhhc2			(N=3)
hpi	vehicle	IAA	IAA+	vehicle	IAA	IAA+
12	0.0051	0.0051	0.0027	0.0049	0	0
	0	0.0021	0.0053	0	0	0
	0.0032	0	0	0	0	0
24	0.0049	0.0074	0.0037	0.0049	0	0
	0.0074	0.0067	0.0024	0.0074	0	0
	0.0038	0.0048	0.0011	0	0	0
36	0.0347	0.0294	0.0184	0.0368	0	0
	0.028	0.0277	0.0145	0.018	0	0
	0.0193	0.0216	0.0106	0.0113	0	0
48	0.4153	0.3762	0.1334	0.3103	0	0
	0.2733	0.2931	0.0528	0.2014	0	0
	0.2049	0.2149	0.0279	0.1516	0	0
60	0.6521	0.5922	0.6279	0.641	0	0
	0.5429	0.5437	0.6474	0.5309	0	0
	0.7861	0.6311	0.6668	0.886	0	0
72	1.7456	2.1337	2.0859	1.4456	0	0
	1.9823	1.9654	2.0989	2.1528	0	0
	2.199	2.079	2.1118	1.899	0	0
96	1.9634	1.9413	2.2713	1.3636	0.75	0
	2.1713	2.2715	2.444	1.713	0.9201	0
	1.9802	1.9672	2.6166	1.8802	0.8333	0
120	2.2589	2.3041	2.4223	2.0589	0.5303	0
	2.3542	2.22	2.4772	2.3542	0.8333	0
	2.5762	2.4138	2.532	2.7778	0.75	0
192	4.3454	4.937	7.9774	7.1154	3.7374	0
	6.1467	6.4133	4.433	4.0432	4.8438	0
	6.8521	6.8482	6.8886	6.963	2.2685	0
Test (two-tailed)		vehicle VS IAA	vehicle VS IAA+		vehicle VS IAA	vehicle VS IAA+
12		0.869792	0.964877		0.373901	0.373901
24		0.518014	0.0850847		0.132282	0.132282
36		0.838166	0.06201		0.0447067	0.0447067
48		0.970015	0.0313519		0.00918284	0.00918284
60		0.393679	0.864039		0.00283067	0.00283067
72		0.581983	0.400575		0.000896517	0.000896517
96		0.870855	0.0277163		0.00691529	0.000408508
120		0.486647	0.461364		0.00173957	0.000327617
192		0.777989	0.639223		0.123883	0.00378278
