# Supplementary material for: Inner membrane complex proteomics reveals a palmitoylation regulation critical for intraerythrocytic development of malaria parasite
Source: eLife. 2022 Jul 1;11:e77447. doi: 10.7554/eLife.77447 (PMC9293000; doi:10.7554/eLife.77447)
Supplement: Figure 5—source data 2. [file elife-77447-fig5-data2.xls]

## Sheet: sheet1
Figure 5E	Quantification of mature schizonts
	Tir1			mAID::dhhc2
	vehicle	IAA	2-BP	vehicle	IAA	2-BP
replicate: (N=3)	0.8715	0.93025	0	1.6075	0.2625	0
	1.53425	1.53425	0	1.20625	0.45625	0
	1.316	1.791	0	1.39325	0.435	0
Test (two-tailed)		0.609054	0.00312922		0.00148624	0.000267824
