# Supplementary material for: Inner membrane complex proteomics reveals a palmitoylation regulation critical for intraerythrocytic development of malaria parasite
Source: eLife. 2022 Jul 1;11:e77447. doi: 10.7554/eLife.77447 (PMC9293000; doi:10.7554/eLife.77447)
Supplement: Figure 5—source data 3. [file elife-77447-fig5-data3.xls]

## Sheet: Figure 5G
Figure 5G	Quantification of Hoechst signal in schizonts
	Ring	Schizont			test	Mann Whitney test
treatment	-	vehicle	IAA			P value	0.3732
Hoechst intensity	2.94	73.02	75.95			Exact or approximate P value?	Exact
	7.58	79.37	71.5			P value summary	ns
	7.39	68.96	72.96			Significantly different (P < 0.05)?	No
	2.91	70.47	67.59			One- or two-tailed P value?	Two-tailed
	7.39	74	71.65			Sum of ranks in column B,C	1075 , 1136
	8.72	72.86	52.89			Mann-Whitney U	470
	5.58	51.39	47.44
	8.35	50.07	51.7
	4.6	56.92	41.92
	5.77	48.98	47.83
	7.63	54.34	74.42
	11.5	63.11	72.21
	5.71	49.81	72.88
	9.7	61.09	75.99
	4.41	48.91	45.04
	7.82	69.28	43.3
	13.73	51.82	48.09
	5.78	53.4	48.43
	4.4	54	55.04
	7.37	49.33	67.11
	8.98	78.57	67.02
	6.49	76.41	74.98
	7.62	76.39	74.78
	5.92	71.86	74.86
	5.84	68.7	72.87
	5.24	78.23	70.6
	6.53	74.67	43.79
	2.82	54.5	56.06
	5.54	41.28	67.41
	5.29	57.92	45.47
	2.33		57.42
	6.47		72.01
	4.09		51.86
	7.04		50.51
	5.14		59.96
	3.85		39.6
	8.6
	5.14
	5.96
	4.45
	10.57
	8.24
	10.51
	9.19
