# Supplementary material for: Inner membrane complex proteomics reveals a palmitoylation regulation critical for intraerythrocytic development of malaria parasite
Source: eLife. 2022 Jul 1;11:e77447. doi: 10.7554/eLife.77447 (PMC9293000; doi:10.7554/eLife.77447)
Supplement: Figure 5—source data 5. [file elife-77447-fig5-data5.xls]

## Sheet: Figure 5J
Figure 5J	Quantification of fully segmented merozoites in schizonts
	mAID::dhhc2			test	Mann Whitney test
	vehicle	IAA			P value		<0.0001
Segmented merozoite per iRBC	13	0			Exact or approximate P value?		Exact
	9	1			P value summary		****
	6	5			Significantly different (P < 0.05)?		Yes
	5	5			One- or two-tailed P value?		Two-tailed
	12	0			Sum of ranks in column B,C		1353 , 477.5
	7	0			Mann-Whitney U		12.5
	9	0
	9	0
	10	2
	7	2
	10	4
	7	0
	9	0
	15	2
	8	6
	9	5
	10	4
	10	4
	9	2
	10	0
	6	0
	7	6
	12	7
	13	6
	12	2
	8	0
	12	2
	14	2
	11	0
	10	0
