# Supplementary material for: Inner membrane complex proteomics reveals a palmitoylation regulation critical for intraerythrocytic development of malaria parasite
Source: eLife. 2022 Jul 1;11:e77447. doi: 10.7554/eLife.77447 (PMC9293000; doi:10.7554/eLife.77447)
Supplement: Figure 6—source data 2. [file elife-77447-fig6-data2.xls]

## Sheet: sheet1
Figure 6B	Acyl-RAC method detecting palmitoylation of GAP45 and CDPK1 in the dhhc1::mAID schizonts treated with vehicle or IAA.
	White boxes indicate the cropped protein band
