# Supplementary material for: Inner membrane complex proteomics reveals a palmitoylation regulation critical for intraerythrocytic development of malaria parasite
Source: eLife. 2022 Jul 1;11:e77447. doi: 10.7554/eLife.77447 (PMC9293000; doi:10.7554/eLife.77447)
Supplement: Figure 6—source data 3. [file elife-77447-fig6-data3.xls]

## Sheet: sheet1
Figure 6E	Solubility assay detected membrane association of GAP45, CDPK1, and MSP1 in the mAID::dhhc2 schizonts treated with vehicle or IAA.
				White boxes indicate the cropped protein band
