# Supplementary material for: Inner membrane complex proteomics reveals a palmitoylation regulation critical for intraerythrocytic development of malaria parasite
Source: eLife. 2022 Jul 1;11:e77447. doi: 10.7554/eLife.77447 (PMC9293000; doi:10.7554/eLife.77447)
Supplement: Figure 7—source data 2. [file elife-77447-fig7-data2.xls]

## Sheet: sheet1
Figure 7F	Palmitoylation analysis of CDPK1::HA and 2 mutant proteins episomally expressed in schizonts.
	White boxes indicate the cropped protein band
