# Supplementary material for: Inner membrane complex proteomics reveals a palmitoylation regulation critical for intraerythrocytic development of malaria parasite
Source: eLife. 2022 Jul 1;11:e77447. doi: 10.7554/eLife.77447 (PMC9293000; doi:10.7554/eLife.77447)
Supplement: Supplementary file 1. [file elife-77447-supp1.xlsx]

## Sheet: Summary of IMC proteins
Subgroup	Gene ID in P. yoelii	Protein Description	Protein ID in Uniprot	Log2(Tb-IMC/Tb-Cyto)	Adjusted P-value (-Log10)	Unique Peptide	Gene ortholog		Reported IMC proteins	Palmitoylation in P. falciparum (ABE mean ratio)(Jones ML, 2012, PMID: 22901544)	Palmitoylation predicated by GPS-Lipid software	Myristoylation predicated by GPS-Lipid software	Enriched in
							P. falciparum	P. berghei					PhIL1 Interactome in P. falciparum (J. S. Wichers, 2021, PMID: 33830607)	PhIL1 Interactome in P. falciparum (Ekta Saini, 2017, PMID: 29138437)		LEGEND
2	PY17X_0103900	cation/H+ antiporter	A0A077XY56	1.00513	2.42176	12	PF3D7_0603500	PBANKA_0102300		ND	√	√				Collumn name	Explanation
1	PY17X_0104200	centrosomal protein CEP76, putative	A0A077XZ21	1.36702	2.0986	6	PF3D7_0603800	PBANKA_0102600		ND	√	√				Subgroup	300 enriched candidates were clustered into two subgroups by Kmeans method based on STRING analysis.
1	PY17X_0106500	ubiquitin-conjugating enzyme E2 PEX4, putative	A0A077Y2S7	1.81035	1.51299	3	PF3D7_0606200	PBANKA_0105000		ND						Gene ID in P. yoelii	PlasmoDB gene ID.
2	PY17X_0106900	coatomer alpha subunit, putative	A0A078JZM0	1.27472	1.90646	94	PF3D7_0606700	PBANKA_0105400		ND	√					Protein Description	PlasmoDB protein product description of the associated gene-ID.
1	PY17X_0109900	palmitoyltransferase DHHC2	A0A078JZQ0	4.35655	3.2998	2	PF3D7_0609800	PBANKA_0108300	Wang et al., 2020 Py; Santos et al., 2015; Fang et al., 2018	ND	√					Protein ID in Uniprot	Uniprot protein ID description of the associated gene-ID.
1	PY17X_0111200	ATP synthase-associated protein, putative	A0A077XZV4	2.01399	1.64617	5	PF3D7_0611300	PBANKA_0109600		ND						Log2(Tb-IMC/Tb-Cyto)	Transformed protein intensity (log2-transformed summed intensity of all detected peptides belonging to this protein) ratio of the experimental group (Tb-IMC) over the control group (Tb-cyto).
1	PY17X_0111500	basal complex transmembrane protein 1, putative	A0A077XYC5	2.20001	2.32849	2	PF3D7_0611600	PBANKA_0109900		ND						Adjusted P-value	Adjusted p-value that reflects the chance that this identification is right (the higher the better).
2	PY17X_0203300	conserved protein, unknown function	A0A078K5K1	1.61259	3.11302	5	PF3D7_0111900	PBANKA_0201900		ND						Unique Peptide	Number of unique peptides identified for this protein only.
2	PY17X_0204500	phosphatidylinositol-4-phosphate 5-kinase, putative	A0A078K2R6	2.09548	2.29801	13	PF3D7_0110600	PBANKA_0203100		ND	√		yes	yes		Gene ortholog	Gene orthology in other Plasmodium species.
1	PY17X_0206000	photosensitized INA-labeled protein PhIL1	A0A078K2T3	2.34482	2.55738	18	PF3D7_0109000	PBANKA_0204600	Kaneko et al., 2015; Schneider et al., 2017; Campelo Morillo et al., 2020 Pb; Saini et al., 2017 Pb; Fang et al., 2018	ND			yes			Reported IMC proteins	Reported IMC proteins among Plasmodium speices.
1	PY17X_0207400	ATP synthase-associated protein, putative	A0A077XYT0	2.13094	2.93342	7	PF3D7_0107400	PBANKA_0206000		ND						Palmitoylation in P. falciparum	Proteins with palmitoylation modification detected by proteome in P. faciparum.
2	PY17X_0207900	ras-related protein Rab-5C, putative	A0A078K036	1.83245	2.5164	7	PF3D7_0106800	PBANKA_0206500		3.5739	√					Enriched in	Two IMC-related proteome acquired recently.
2	PY17X_0208400	calcium-transporting ATPase, putative	A0A077XYU2	3.03588	2.94458	153	PF3D7_0106300	PBANKA_0207000		2.2919	√		yes			#N/A	Absent orthology in some Plasmodium species.
1	PY17X_0209700	novel putative transporter 1	A0A077XZU8	2.43189	2.47371	4	PF3D7_0104800	PBANKA_0208300	Boisson et al. 2012	3.1309	√					ND	Palmitoylation modification of proteins was not detected in the study (Jones ML, 2012).
1	PY17X_0210400	conserved Plasmodium protein, unknown function	A0A077XYW8	2.73884	2.11416	4	PF3D7_0104100	PBANKA_0209000		ND	√	√
2	PY17X_0211400	vacuolar protein sorting-associated protein 51, putative	A0A4V0KES1	1.69989	2.09809	2	PF3D7_0103100	PBANKA_0210000		ND	√
2	PY17X_0212500	vacuolar protein sorting-associated protein 53, putative	A0A078K318	1.86007	1.86209	7	PF3D7_0727000	PBANKA_0211100		ND	√
1	PY17X_0212700	cysteine desulfurase IscS, putative	A0A078K6D7	3.82117	1.23621	2	PF3D7_0727200	PBANKA_0211300		3.39603
2	PY17X_0213300	cation transporting ATPase, putative	A0A077Y1C9	2.41069	2.64635	78	PF3D7_0727800	PBANKA_0211900		ND	√
1	PY17X_0301800	conserved Plasmodium protein, unknown function	A0A078K627	1.51635	2.88734	2	PF3D7_0203400	PBANKA_0301300		ND
2	PY17X_0302600	conserved Plasmodium protein, unknown function	A0A077Y1I9	1.59673	2.6398	12	PF3D7_0204200	PBANKA_0302000		ND
1	PY17X_0303100	hexose transporter	Q8I756	2.64518	2.29282	5	PF3D7_0204700	PBANKA_0302500		4.08267	√
1	PY17X_0307300	transporter, putative	A0A078K6P1	1.70874	2.33339	7	PF3D7_0209600	PBANKA_0306700		ND	√
2	PY17X_0307800	monocarboxylate transporter, putative	A0A077Y3V6	2.80557	1.83278	2	PF3D7_0210300	PBANKA_0307200		ND
2	PY17X_0308200	syntaxin, putative	A0A078K3Z9	3.13278	2.09149	4	PF3D7_0210700	PBANKA_0307600	Parish et al., 2008	ND
1	PY17X_0312300	acyl-CoA synthetase, putative	A0A078K6T0	2.38735	1.38129	2	PF3D7_0215000	PBANKA_0311800		1.9004	√	√
1	PY17X_0312400	RING zinc finger protein, putative	A0A078K6B5	2.48741	2.04555	9	PF3D7_0215100	PBANKA_0311900		ND	√	√
1	PY17X_0312800	conserved Plasmodium protein, unknown function	A0A077Y3Z8	1.30659	2.82785	3	PF3D7_0215600	PBANKA_0312300		ND
2	PY17X_0313800	sugar transporter, putative	A0A078K6U3	1.9512	1.53928	2	PF3D7_0216600	PBANKA_0313300		ND	√
1	PY17X_0314000	TMEM121 domain-containing protein, putative	A0A078K0S2	1.73962	2.10488	3	PF3D7_0216800	PBANKA_0313500		ND	√
1	PY17X_0314700	calcium-dependent protein kinase 1	A0A4V0KGR8	1.7031	1.84381	20	PF3D7_0217500	PBANKA_0314200	Fang et al., 2018	4.7055	√	√
1	PY17X_0315800	patatin-like phospholipase, putative	A0A077Y426	1.40819	2.60608	32	PF3D7_0218600	PBANKA_0315300		ND	√	√
1	PY17X_0404200	palmitoyltransferase DHHC1, putative	A0A077Y4B6	5.12092	2.84818	4	PF3D7_0303400	PBANKA_0402000	Wetzel et al., 2015	6.9968		√	yes
1	PY17X_0404500	lipoamide acyltransferase component of branched-chain alpha-keto acid dehydrogenase complex, putative	A0A078K6P5	1.27157	1.26472	9	PF3D7_0303700	PBANKA_0402300		3.64707	√
1	PY17X_0404900	inner membrane complex protein 1e	A0A078K731	1.04094	2.42801	3	PF3D7_0304100	PBANKA_0402700	Kono et al., 2012; Tremp et al., 2014 Pb	3.89913	√		yes
1	PY17X_0405000	EH domain-containing protein, putative	A0A077Y233	1.4588	2.21999	82	PF3D7_0304200	PBANKA_0402800		ND
1	PY17X_0407000	FAD-dependent glycerol-3-phosphate dehydrogenase, putative	A0A078K6T2	2.92905	1.72235	2	PF3D7_0306400	PBANKA_0404800		2.21617
2	PY17X_0411300	conserved Plasmodium protein, unknown function	A0A077Y2A2	4.77476	2.12411	4	PF3D7_0310800	PBANKA_0408800		ND
1	PY17X_0412300	ATP synthase F0 subunit d-like protein, putative	A0A078K700	1.72598	1.69508	12	PF3D7_0311800	PBANKA_0409800		ND
2	PY17X_0412900	glycogen synthase kinase 3, putative	A0A078K1C8	1.09243	2.26391	3	PF3D7_0312400	PBANKA_0410400		ND	√
1	PY17X_0413000	major facilitator superfamily-related transporter, putative	A0A077Y4J6	2.97012	1.44017	2	PF3D7_0312500	PBANKA_0410500		ND	√
2	PY17X_0414600	vesicle transport v-SNARE protein, putative	A0A077Y071	2.78974	2.64595	7	PF3D7_0314100	PBANKA_0411800		ND
2	PY17X_0417300	protein YOP1, putative	A0A077Y4P1	3.04584	1.92768	7	PF3D7_0316700	PBANKA_0414500	Burda et al., 2017	ND
2	PY17X_0418000	vacuolar protein sorting-associated protein 46, putative	A0A077Y151	1.43491	2.27455	8	PF3D7_0906100	PBANKA_0415200		ND	√	√
2	PY17X_0419300	copper-transporting ATPase	A0A078K4R3	2.26696	2.35706	97	PF3D7_0904900	PBANKA_0416500		3.01317	√	√
2	PY17X_0421000	ras-related protein RAB7, putative	A0A077Y181	2.27648	2.50393	11	PF3D7_0903200	PBANKA_0418200		ND	√
2	PY17X_0421100	protein RER1, putative	A0A078K1J8	2.61312	2.96783	3	PF3D7_0903100	PBANKA_0418300		ND	√
2	PY17X_0502600	golgi re-assembly stacking protein, putative	A0A078K7D2	3.18541	2.4578	6	PF3D7_1017300	PBANKA_0501600		ND		√
1	PY17X_0502800	Myosin essential light chain ELC, putative	A0A077Y2Q5	1.0598	2.41347	2	PF3D7_1017500	PBANKA_0501800	Green et al., 2017	ND	√
2	PY17X_0503600	peptidase, putative	A0A077Y1R6	4.59053	3.46506	33	PF3D7_1018300	PBANKA_0502600		3.20557	√
2	PY17X_0506200	ADP-ribosylation factor, putative	A0A078K1T7	2.15501	3.55905	22	PF3D7_1020900	PBANKA_0505100		2.47677		√	yes
2	PY17X_0508200	CDGSH iron-sulfur domain-containing protein, putative	A0A077Y1Z0	2.92616	2.50176	3	PF3D7_1022900	PBANKA_0507100		ND
1	PY17X_0508300	conserved Plasmodium protein, unknown function	A0A078K4S5	2.83541	2.54343	7	PF3D7_1023000	PBANKA_0507200		ND
1	PY17X_0509600	ATP synthase-associated protein, putative	A0A077Y559	1.42954	1.96432	2	PF3D7_1024300	PBANKA_0508500		ND
2	PY17X_0511100	conserved protein, unknown function	A0A078K7Q2	1.76711	1.54062	2	PF3D7_1025800	PBANKA_0510000		ND
1	PY17X_0513800	conserved Plasmodium protein, unknown function	A0A078K4W9	1.02479	1.9852	10	PF3D7_1028600	PBANKA_0512700		ND	√
1	PY17X_0516200	MORN repeat-containing protein 1, putative	A0A078K214	1.085	1.9246	4	PF3D7_1031200	PBANKA_0515200	Ferguson et al., 2008; Kono et al., 2016; Rudlaff et al., 2019	ND	√	√
1	PY17X_0516600	protein phosphatase inhibitor 3, putative	A0A078K7V3	2.94367	1.32116	2	PF3D7_1031700	PBANKA_0515500		ND	√
1	PY17X_0517300	phosphatidylinositol N-acetylglucosaminyltransferase subunit A, putative	A0A078K4Z4	2.16506	3.21835	4	PF3D7_1032400	PBANKA_0516200		ND	√
2	PY17X_0518900	Sec1 family protein, putative	A0A078K5G3	1.73956	2.63023	21	PF3D7_1034000	PBANKA_0517800		ND	√
1	PY17X_0519300	flavoprotein subunit of succinate dehydrogenase, putative	A0A078K508	1.36284	1.57228	3	PF3D7_1034400	PBANKA_0518200		ND	√	√
1	PY17X_0525300	glideosome associated protein with multiple membrane spans 2, putative	A0A4V0KHU0	3.40472	2.55714	26	PF3D7_0423500	PBANKA_0523900	Bullen et al., 2009; Hu et al., 2010; Kono et al., 2012; Fang et al., 2018	5.26227	√		yes	yes
1	PY17X_0604900	major facilitator superfamily domain-containing protein, putative	A0A4V6MAE7	5.40112	3.24576	6	PF3D7_1203400	PBANKA_0602400		ND	√
2	PY17X_0607100	conserved protein, unknown function	A0A077Y5P7	1.41125	1.96737	17	PF3D7_1205900	PBANKA_0604600		ND
2	PY17X_0611000	SNARE protein, putative	A0A077Y1I3	2.27184	2.4707	5	PF3D7_1210100	PBANKA_0608500		ND	√	√
2	PY17X_0613900	pantothenate kinase 2, putative	A0A078KD69	1.03665	2.28443	7	PF3D7_1437400	PBANKA_0611400		ND	√	√
1	PY17X_0614300	N-acetyltransferase, GNAT family, putative	A0A078KDP8	2.38068	2.75893	55	PF3D7_1437000	PBANKA_0611800		ND	√
1	PY17X_0615700	conserved Plasmodium protein, unknown function	A0A077Y404	1.54682	1.1791	6	PF3D7_0411800	PBANKA_0613000		ND	√
1	PY17X_0617900	calcium-dependent protein kinase 4	A0A4V0KIA2	1.06308	2.10078	5	PF3D7_0717500	PBANKA_0615200	Fang et al., 2018	ND	√	√
2	PY17X_0618000	conserved Plasmodium protein, unknown function	A0A077Y2V8	2.19404	3.17441	15	PF3D7_0717600	PBANKA_0615300		ND			yes
2	PY17X_0703100	protein disulfide-isomerase, putative	A0A078K5B2	1.0606	1.60748	6	PF3D7_0827900	PBANKA_0702800		2.31433	√
2	PY17X_0707000	dicarboxylate/tricarboxylate carrier, putative	A0A077Y4J7	1.24798	2.73933	10	PF3D7_0823900	PBANKA_0706700		3.46563
1	PY17X_0707100	DnaJ protein, putative	A0A077Y258	2.18302	2.82968	27	PF3D7_0823800	PBANKA_0706800		2.6704
2	PY17X_0708300	protein transport protein SEC23, putative	A0A078K8N5	1.52131	2.63829	113	PF3D7_0822600	PBANKA_0708000		ND	√
1	PY17X_0709600	conserved Plasmodium protein, unknown function	A0A078K5G9	2.8529	1.83507	11	PF3D7_0821400	PBANKA_0709400		ND
2	PY17X_0710000	conserved Plasmodium protein, unknown function	A0A078K2L1	2.50776	2.86534	17	PF3D7_0821000	PBANKA_0709800		2.20077
2	PY17X_0711400	conserved protein, unknown function	A0A078K8H8	4.80229	3.3611	25	PF3D7_0819600	PBANKA_0711200		9.63693	√
2	PY17X_0714800	vacuolar protein sorting-associated protein 2, putative	A0A078K8U4	4.01417	2.22429	3	PF3D7_0816200	PBANKA_0714600		1.8333		√
2	PY17X_0715500	conserved Plasmodium protein, unknown function	A0A078K2Q5	3.21569	1.96964	16	PF3D7_0815500	PBANKA_0715300		11.3494	√
1	PY17X_0715700	phosphoglucomutase-2	A0A077Y6M7	1.82511	3.96973	6	PF3D7_0413500	PBANKA_0715500		4.0073	√
1	PY17X_0721600	conserved Plasmodium protein, unknown function	A0A077Y6S5	1.53407	3.21704	25	PF3D7_0419500	PBANKA_0721600		ND		√
2	PY17X_0804800	phosphoinositide-binding protein, putative	A0A077Y2U6	1.32659	1.44711	36	PF3D7_0704400	PBANKA_0802100		ND	√
1	PY17X_0812700	P1 nuclease	A0A078K9L8	3.34947	2.33371	9	PF3D7_0908000	PBANKA_0809400		ND
2	PY17X_0815000	SNARE protein, putative	A0A077Y462	2.84893	2.37159	7	PF3D7_0910600	PBANKA_0811700		ND	√		yes
1	PY17X_0815500	conserved protein, unknown function	A0A077Y468	2.22779	3.12869	67	PF3D7_0911100	PBANKA_0812200		ND	√		yes
1	PY17X_0816700	alkaline phosphatase, putative	A0A078K9Q6	1.83474	2.79007	10	PF3D7_0912400	PBANKA_0813400		3.76763	√
1	PY17X_0818500	phospholipid or glycerol acyltransferase, putative	A0A077Y496	2.79069	1.64095	4	PF3D7_0914200	PBANKA_0815200		2.71033	√
1	PY17X_0819000	major facilitator superfamily-related transporter, putative	A0A078K6B7	3.76929	3.83238	13	PF3D7_0914700	PBANKA_0815700		3.78947	√
1	PY17X_0819200	BSD-domain protein, putative	A0A077Y5I0	1.60203	2.24968	12	PF3D7_0914900	PBANKA_0815900		ND
1	PY17X_0819300	type II NADH:ubiquinone oxidoreductase	A0A078K9C1	3.94496	2.37038	6	PF3D7_0915000	PBANKA_0816000		2.87827
1	PY17X_0820300	major facilitator superfamily domain-containing protein, putative	A0A078K9D0	2.04493	2.1042	7	PF3D7_0916000	PBANKA_0817000		ND			yes
1	PY17X_0822300	glideosome-associated protein 50, putative	A0A077Y3G1	3.62089	3.40928	31	PF3D7_0918000	PBANKA_0819000	Baum et al., 2006; Yeoman et al., 2011; Fang et al., 2018	3.9143	√		yes	yes
2	PY17X_0823300	DnaJ protein, putative	A0A077Y3H3	2.45466	3.13255	12	PF3D7_0919100	PBANKA_0820000		4.17757
1	PY17X_0824200	elongation of fatty acids protein, putative	A0A078K9Y0	1.35815	1.93041	2	PF3D7_0920000	PBANKA_0820900		ND	√
1	PY17X_0824900	CRAL/TRIO domain-containing protein, putative	A0A077Y7M3	1.49153	2.58527	15	PF3D7_0920700	PBANKA_0821600		ND	√		yes
1	PY17X_0830500	monocarboxylate transporter, putative	A0A078K6N4	3.62613	2.6465	3	PF3D7_0926400	PBANKA_0827200		ND	√
1	PY17X_0831200	conserved protein, unknown function	A0A077Y609	3.46634	2.10744	3	PF3D7_0927100	PBANKA_0827900		ND
1	PY17X_0831400	fumarate hydratase, putative	A0A078K3K3	2.61368	1.84082	2	PF3D7_0927300	PBANKA_0828100		ND	√	√
2	PY17X_0836300	protein MAM3, putative	A0A077Y3X9	1.29601	2.1742	16	PF3D7_0932100	PBANKA_0832900		ND	√
1	PY17X_0838900	UBX domain-containing protein, putative	A0A077Y3Z7	2.8828	2.05993	14	PF3D7_0934700	PBANKA_0835500		ND	√	√
1	PY17X_0839000	cAMP-dependent protein kinase catalytic subunit, putative	Q26217	1.6149	2.03971	11	PF3D7_0934800	PBANKA_0835600		ND
2	PY17X_0839700	cytoadherence linked asexual protein 9	A0A078K783	1.03096	1.20724	3	PF3D7_0935800	PBANKA_0836300		2.18525	√
1	PY17X_0902600	peroxisome assembly protein 22, putative	A0A077Y850	1.97911	2.03814	4	PF3D7_1147900	PBANKA_0901200		ND	√	√
2	PY17X_0903600	protein YIPF6, putative	A0A078K714	1.84593	1.43144	3	PF3D7_1146900	PBANKA_0902200		ND	√
1	PY17X_0905200	serine/threonine protein kinase, putative	A0A077Y4E9	1.33154	2.01676	10	PF3D7_1145200	PBANKA_0903800		ND	√
1	PY17X_0907200	DnaJ protein, putative	A0A078K7G9	2.59244	3.1678	4	PF3D7_1143200	PBANKA_0905800		2.81243	√
1	PY17X_0907600	ATP synthase-associated protein, putative	A0A077Y539	1.45898	1.68181	7	PF3D7_1142800	PBANKA_0906200		ND	√
2	PY17X_0909100	conserved protein, unknown function	A0A077Y550	1.53879	2.95749	11	PF3D7_1141300	PBANKA_0907700		ND	√
2	PY17X_0909200	ATP synthase-associated protein, putative	A0A077Y4I6	2.26574	1.88563	2	PF3D7_1141200	PBANKA_0907800		ND		√
2	PY17X_0910500	ER membrane protein complex subunit 8, putative	A0A078K499	3.21965	2.8108	7	PF3D7_1139900	PBANKA_0909100		ND
1	PY17X_0914200	3-oxo-5-alpha-steroid 4-dehydrogenase, putative	A0A078K7D1	1.72312	1.86507	6	PF3D7_1135900	PBANKA_0912700		3.4128	√	√
2	PY17X_0914700	conserved Plasmodium membrane protein, unknown function	A0A078K7D6	2.83883	2.36906	3	PF3D7_1135300	PBANKA_0913200		ND	√
2	PY17X_0915200	coatomer subunit delta, putative	A0A078K7D9	1.61505	2.53971	18	PF3D7_1134800	PBANKA_0913700		ND
1	PY17X_0917100	aquaglyceroporin (AQP)	A0A078K4H4	1.66417	1.8424	3	PF3D7_1132800	PBANKA_0915600	Promeneur et al., 2007	3.82543		√
2	PY17X_0922800	CRAL/TRIO domain-containing protein, putative	A0A078K4K4	2.43921	1.1333	18	PF3D7_1127600	PBANKA_0920800		ND		√
1	PY17X_0923700	autophagy-related protein 23, putative	A0A077Y4Q7	1.7046	2.65186	7	PF3D7_1126700	PBANKA_0921700		ND	√
1	PY17X_0925100	conserved Plasmodium protein, unknown function	A0A077Y6X5	3.16727	2.85376	4	PF3D7_1125200	PBANKA_0923100		ND
1	PY17X_0925200	ATP synthase F0 subunit b-like protein, putative	A0A078KAS1	2.76584	2.52315	14	PF3D7_1125100	PBANKA_0923200		ND
2	PY17X_0928200	GPI transamidase component GPI16	A0A077Y4V9	3.53951	2.67613	2	PF3D7_1122100	PBANKA_0926200		ND	√
1	PY17X_0928400	serine/threonine protein kinase, putative	A0A077Y5S4	1.72797	1.28523	2	PF3D7_1121900	PBANKA_0926400		ND
1	PY17X_0928500	peptidase M16, putative	A0A078K802	4.76198	2.88353	2	PF3D7_1121800	PBANKA_0926500		ND	√
1	PY17X_0929000	tyrosine kinase-like protein, putative	A0A4V0KLA5	4.83824	1.7589	5	PF3D7_1121300	PBANKA_0927000		ND
2	PY17X_0931100	acyl-CoA-binding protein, putative	A0A078KBC0	3.06416	3.90491	13	PF3D7_1119000	PBANKA_0929100		6.952
1	PY17X_0933500	folate transporter 2, putative	A0A077Y581	5.87665	2.76439	3	PF3D7_1116500	PBANKA_0931500		ND	√
2	PY17X_0933600	guanine nucleotide-exchange factor SEC12, putative	A0A077Y754	2.58285	2.52914	27	PF3D7_1116400	PBANKA_0931600		ND	√		yes
2	PY17X_0935800	conserved Plasmodium protein, unknown function	A0A078K4V2	3.4884	3.51243	6	PF3D7_1113800	PBANKA_0933800		ND	√
2	PY17X_0936300	UDP-galactose transporter, putative	A0A077Y928	2.62286	3.35673	2	PF3D7_1113300	PBANKA_0934300		ND		√
2	PY17X_0938300	protein transport protein BOS1, putative	A0A078K4X6	2.63862	3.14118	13	PF3D7_1111300	PBANKA_0936300		ND
1	PY17X_0944100	conserved Plasmodium protein, unknown function	A0A077Y7D4	3.21504	2.25374	11	PF3D7_1105300	PBANKA_0941600		ND	√
1	PY17X_1002900	alpha/beta hydrolase, putative	A0A078KIN2	1.76358	2.03115	13	PF3D7_0403800	PBANKA_1001500		8.06177		√
2	PY17X_1006200	peptidyl-tRNA hydrolase 2, putative	A0A078KF29	5.49235	2.59439	2	PF3D7_0407200	PBANKA_1004800		3.55063	√	√
1	PY17X_1006800	protein CINCH, putative	A0A078KEN6	2.36432	3.23902	43	PF3D7_0407800	PBANKA_1005400	Rudlaff et al., 2019	ND	√	√	yes
2	PY17X_1010300	conserved Plasmodium protein, unknown function	A0A078KC29	1.06047	2.96827	3	PF3D7_1436100	PBANKA_1008700		ND	√
2	PY17X_1014400	SNARE protein, putative	A0A078KFA6	3.2282	2.2265	3	PF3D7_1432000	PBANKA_1012900		ND		√
1	PY17X_1016600	conserved Plasmodium protein, unknown function	A0A078KJ24	3.51391	3.60737	3	PF3D7_1429600	PBANKA_1015100		3.0602	√
1	PY17X_1017900	major facilitator superfamily domain-containing protein, putative	A0A078KFD7	2.77	2.55814	11	PF3D7_1428200	PBANKA_1016400		ND
2	PY17X_1018700	conserved Plasmodium protein, unknown function	A0A078KIT0	2.80572	1.7832	2	PF3D7_1427400	PBANKA_1017200		ND	√	√
1	PY17X_1020400	conserved Plasmodium protein, unknown function	A0A078KFF7	2.28757	2.65375	5	PF3D7_1425700	PBANKA_1018900		ND	√	√
2	PY17X_1022800	ERAD-associated E3 ubiquitin-protein ligase HRD1, putative	A0A078KFG9	1.62675	1.77295	3	PF3D7_1422500	PBANKA_1020900		ND	√
2	PY17X_1027200	ATP synthase-associated protein, putative	A0A078KCM0	1.75488	2.18484	4	PF3D7_1417900	PBANKA_1024800		ND
1	PY17X_1027800	cysteine protease ATG4, putative	A0A077YJG0	1.90509	1.20146	3	PF3D7_1417300	PBANKA_1025400		ND	√
2	PY17X_1028900	metacaspase-3, putative	A0A078KFA7	3.45294	2.47062	5	PF3D7_1416200	PBANKA_1026500		ND			yes
2	PY17X_1029000	protein SEY1, putative	A0A077YF80	1.33659	3.30016	25	PF3D7_1416100	PBANKA_1026600		ND	√
2	PY17X_1029400	serine palmitoyltransferase, putative	A0A077YGA8	1.17617	2.04502	18	PF3D7_1415700	PBANKA_1027000		ND	√
2	PY17X_1031200	DnaJ protein, putative	A0A077YG17	2.40374	2.64556	8	PF3D7_1413900	PBANKA_1028800		2.88723	√
1	PY17X_1033700	rhomboid protease ROM8	A0A078KCU1	1.96913	2.20031	8	PF3D7_1411200	PBANKA_1031300		ND	√	√
1	PY17X_1033800	conserved Plasmodium protein, unknown function	A0A078KFQ2	3.92203	1.95632	5	PF3D7_1411100	PBANKA_1031400		3.70777	√
2	PY17X_1034200	conserved protein, unknown function	A0A078KCU7	2.40002	3.10605	3	PF3D7_1410700	PBANKA_1031800		3.69997	√
2	PY17X_1035000	cytidine diphosphate-diacylglycerol synthase, putative	A0A077YFD3	2.29349	2.88646	8	PF3D7_1409900	PBANKA_1032600		ND		√
1	PY17X_1035300	conserved Plasmodium protein, unknown function	A0A078KFR4	2.52033	2.48101	7	PF3D7_1409600	PBANKA_1032900		ND	√
1	PY17X_1035500	conserved protein, unknown function	A0A077YFD7	5.06958	3.23133	13	PF3D7_1409400	PBANKA_1033100		4.79067
1	PY17X_1037400	conserved Plasmodium protein, unknown function	A0A077YGH6	2.78273	2.85288	7	PF3D7_1407200	PBANKA_1035000		8.3176	√
1	PY17X_1037800	glideosome associated protein with multiple membrane spans 3, putative	A0A078KFT5	3.15788	2.59569	2	PF3D7_1406800	PBANKA_1035400	Bullen et al., 2009; Kono et al., 2012; Fang et al., 2018	9.9343		√	yes	yes
2	PY17X_1037900	vacuolar protein sorting-associated protein 29, putative	A0A078KFN6	1.57362	2.13015	12	PF3D7_1406700	PBANKA_1035500		ND	√
2	PY17X_1107400	GTPase-activating protein, putative	A0A078KBN7	2.77414	1.50586	4	PF3D7_0506700	PBANKA_1106300		ND	√
1	PY17X_1107600	rhomboid protease ROM4	A0A077Y6K4	1.99655	3.05441	27	PF3D7_0506900	PBANKA_1106500		8.91837	√
2	PY17X_1108500	conserved protein, unknown function	A0A078K5G4	1.40555	2.07829	50	PF3D7_0507800	PBANKA_1107400		ND	√
1	PY17X_1109000	triose phosphate transporter	A0A077Y9R3	1.73266	2.08785	6	PF3D7_0508300	PBANKA_1107900		2.75703
1	PY17X_1111900	stearoyl-CoA desaturase, putative	A0A077Y5X0	3.18102	1.81651	4	PF3D7_0511200	PBANKA_1110700		2.62613	√	√
1	PY17X_1112000	MORN repeat protein, putative	A0A077Y7Q6	1.44373	1.92018	13	PF3D7_0511300	PBANKA_1110800		ND
2	PY17X_1113400	ras-related protein Rab-1B, putative	A0A078K8W9	1.36804	2.53661	4	PF3D7_0512600	PBANKA_1112300		ND	√
2	PY17X_1114600	ras-related protein Rab-1A, putative	A0A078KBZ7	1.13596	1.94713	8	PF3D7_0513800	PBANKA_1113500		ND
2	PY17X_1116100	phosphatidylinositol 3-kinase, putative	A0A078KCD0	3.92158	2.6442	3	PF3D7_0515300	PBANKA_1114900		ND	√	√
1	PY17X_1116500	glideosome-associated protein 40, putative	A0A077Y610	3.44133	2.56924	26	PF3D7_0515700	PBANKA_1115300	Green et al., 2017	6.11913
2	PY17X_1119300	conserved protein, unknown function	A0A078K5V2	1.81815	2.73561	28	PF3D7_0619000	PBANKA_1118200		ND	√		yes
2	PY17X_1120000	F-box protein FBXO1, putative	A0A077Y635	3.62562	2.61474	10	PF3D7_0619700	PBANKA_1118900	Baptista et al., 2019 Tg	ND	√	√
2	PY17X_1125300	sphingomyelin synthase 1, putative	A0A077Y675	1.86742	1.86922	2	PF3D7_0625000	PBANKA_1123900		ND	√
2	PY17X_1126600	CRAL/TRIO domain-containing protein, putative	A0A078K610	1.64947	4.03548	13	PF3D7_0626400	PBANKA_1125200		ND	√		yes
2	PY17X_1127500	E3 ubiquitin-protein ligase RNF5, putative	A0A078KCN0	2.31586	2.07977	8	PF3D7_0627300	PBANKA_1126000		ND	√
1	PY17X_1131200	tetratricopeptide repeat protein, putative	A0A078K656	5.95583	3.26261	17	PF3D7_0631000	PBANKA_1129800		ND		√
2	PY17X_1132200	phosphoinositide phosphatase SAC1, putative	A0A077Y7A0	1.79236	2.51688	12	PF3D7_1354200	PBANKA_1130800		ND	√		yes
2	PY17X_1132400	V-type proton ATPase 21 kDa proteolipid subunit, putative	A0A077Y8A9	3.15819	2.28361	2	PF3D7_1354400	PBANKA_1131000		2.66287
1	PY17X_1134600	serine/threonine protein kinase ARK3, putative	A0A078KCT5	2.98577	2.06846	3	PF3D7_1356800	PBANKA_1133100		ND	√	√	yes
2	PY17X_1137900	ER membrane protein complex subunit 3, putative	A0A077Y6K9	3.34504	3.40696	10	PF3D7_1360200	PBANKA_1136400		ND
2	PY17X_1138600	protein transport protein Sec24A, putative	A0A077Y6L2	1.35648	2.46891	146	PF3D7_1361100	PBANKA_1137200		ND	√
1	PY17X_1139700	transmembrane and coiled-coil domain-containing protein 1, putative	A0A077YAP1	1.92833	2.92448	3	PF3D7_1362300	PBANKA_1138300		ND	√
1	PY17X_1141300	reticulon-like protein, putative	A0A078K6H4	2.61309	2.99203	7	#N/A	PBANKA_1139900		ND	√
2	PY17X_1142900	SNARE associated Golgi protein, putative	A0A077Y6R7	2.40835	2.58513	18	PF3D7_1365700	PBANKA_1141500		3.87997
1	PY17X_1146100	conserved protein, unknown function	A0A077Y6W9	1.23203	1.47371	10	PF3D7_1368900	PBANKA_1144800		ND
1	PY17X_1146200	glycosylphosphatidylinositol anchor attachment 1 protein, putative	A0A078KCR8	2.45694	2.63248	4	PF3D7_1369000	PBANKA_1144900		ND	√	√
1	PY17X_1204200	conserved Plasmodium protein, unknown function	A0A077Y6Z7	1.76909	3.24808	33	PF3D7_1002700	PBANKA_1201100		ND	√	√
1	PY17X_1205100	inner membrane complex protein 1c	A0A077Y7Y6	2.08347	2.34519	12	PF3D7_1003600	PBANKA_1202000	Hu et al., 2010; Kono et al., 2012; Tremp et al., 2014; Tremp et al., 2017; Saini et al. 2021	4.26877	√		yes	yes
1	PY17X_1206100	conserved protein, unknown function	A0A078K9U9	4.25786	1.22271	2	PF3D7_1004700	PBANKA_1203000		ND
2	PY17X_1208300	PPPDE peptidase, putative	A0A078KDD9	2.29755	2.035	12	PF3D7_1006900	PBANKA_1205100		ND	√
2	PY17X_1209900	protein GPR89, putative	A0A077Y781	2.23408	1.58509	2	PF3D7_1008500	PBANKA_1206700		ND
1	PY17X_1212900	protein ARV1, putative	A0A078KDB4	1.24448	2.17607	4	PF3D7_1011300	PBANKA_1209700		ND	√
2	PY17X_1214900	conserved Plasmodium protein, unknown function	A0A077Y7D2	2.67402	1.42703	3	PF3D7_1013300	PBANKA_1211700		4.00093
2	PY17X_1217800	Rab3 GTPase-activating protein non-catalytic subunit, putative	A0A077Y965	1.20363	1.69831	11	PF3D7_1016200	PBANKA_1214600		ND	√	√
2	PY17X_1219400	diacylglycerol O-acyltransferase, putative	A0A077Y7H7	4.27729	1.92436	5	PF3D7_0322300	PBANKA_1216200		ND	√
2	PY17X_1219800	cyclic amine resistance locus protein, putative	A0A078KDW0	1.62532	3.46266	11	PF3D7_0321900	PBANKA_1216600		ND	√
1	PY17X_1220300	pseudo protein kinase 1, putative	A0A077Y986	2.37456	3.02694	17	PF3D7_0321400	PBANKA_1217100		ND	√	√
2	PY17X_1221000	signal peptidase complex subunit 2, putative	A0A078K7E1	2.58582	2.96235	5	PF3D7_0320700	PBANKA_1217800		4.04267
2	PY17X_1221600	protein transport protein SEC22, putative	A0A078KAB4	2.25476	2.46455	8	PF3D7_0320100	PBANKA_1218400		ND	√
2	PY17X_1221800	conserved protein, unknown function	A0A078KDX8	1.2512	1.52311	2	PF3D7_0319900	PBANKA_1218600		ND
2	PY17X_1223700	conserved protein, unknown function	A0A077Y7I9	1.13338	1.8996	10	PF3D7_0709900	PBANKA_1220500		ND	√
2	PY17X_1225500	coatomer subunit epsilon, putative	A0A078K7G7	1.34883	2.3187	32	PF3D7_0808400	PBANKA_1222300		ND
2	PY17X_1227000	V-type proton ATPase subunit a, putative	A0A077YBE3	3.18082	3.01046	82	PF3D7_0806800	PBANKA_1223800		2.6451		√
1	PY17X_1227600	ferlin-like protein	A0A077Y8J6	1.44631	2.26655	70	PF3D7_0806300	PBANKA_1224400		ND
2	PY17X_1228900	GTPase-activating protein, putative	A0A077Y7R7	2.24472	2.79713	23	PF3D7_0804900	PBANKA_1225700		ND	√		yes
2	PY17X_1232100	conserved protein, unknown function	A0A078KE44	1.76273	3.59874	3	PF3D7_0801600	PBANKA_1228600		ND
1	PY17X_1237400	V-type proton ATPase 16 kDa proteolipid subunit, putative	A0A078KAR7	3.43959	2.64392	3	PF3D7_0519200	PBANKA_1234000		ND	√
1	PY17X_1240600	magnesium transporter NIPA, putative	A0A077Y807	3.54065	3.49368	21	PF3D7_0522600	PBANKA_1237300	Hu et al., 2010; Kono et al., 2012	5.7975
1	PY17X_1243100	acyl-CoA synthetase, putative	A0A078KEB4	1.10317	2.3384	24	PF3D7_0525100	PBANKA_1239900		5.49767
1	PY17X_1243800	inner membrane complex protein 1g, putative	A0A078K7X2	1.51572	2.41672	15	PF3D7_0525800	PBANKA_1240600	Hu et al., 2010; Kono et al., 2012; Gao et al., 2018 Py; Fang et al., 2018	5.6345	√		yes	yes
2	PY17X_1244400	conserved Plasmodium protein, unknown function	A0A078KAY4	3.8362	1.26031	2	PF3D7_0526400	PBANKA_1241200		ND
1	PY17X_1246400	palmitoyltransferase DHHC7	A0A078KE97	3.85807	2.4934	8	PF3D7_0528400	PBANKA_1243000		ND	√	√
2	PY17X_1305200	vacuole membrane protein 1, putative	A0A077Y972	3.78789	3.27883	4	PF3D7_1474600	PBANKA_1301600		ND	√
2	PY17X_1305800	translocation protein SEC62, putative	A0A077Y8C9	1.63932	1.59304	5	PF3D7_1438100	PBANKA_1302200		2.22587	√
2	PY17X_1307000	Sad1/UNC domain-containing protein, putative	A0A078KK22	2.41949	1.6595	2	PF3D7_1439300	PBANKA_1303200		ND	√
2	PY17X_1307500	vesicle-associated membrane protein, putative	A0A077Y8E3	2.59883	2.45258	37	PF3D7_1439800	PBANKA_1303700		ND
1	PY17X_1308500	major facilitator superfamily domain-containing protein, putative	A0A077Y8E8	5.11077	1.48347	9	PF3D7_1440800	PBANKA_1304700		ND	√
1	PY17X_1309300	acid cluster protein 33 homologue, putative	A0A077YC79	2.03784	2.97197	18	PF3D7_1441600	PBANKA_1305500		ND	√
2	PY17X_1311400	dephospho-CoA kinase, putative	A0A077Y9A9	1.57455	1.56124	5	PF3D7_1443700	PBANKA_1307600		ND	√	√
1	PY17X_1312000	1-acyl-sn-glycerol-3-phosphate acyltransferase, putative	A0A078KK68	3.06409	1.76833	6	PF3D7_1444300	PBANKA_1308200		4.22637
1	PY17X_1315300	conserved protein, unknown function	A0A077Y8T1	2.06853	2.74283	6	PF3D7_1447700	PBANKA_1311500		4.26577	√
1	PY17X_1315500	multidrug resistance protein 2, putative	A0A078KG97	2.50136	1.68413	55	PF3D7_1447900	PBANKA_1311700		2.36537	√
2	PY17X_1316100	SNARE protein, putative	A0A078KKB1	3.14273	2.74031	9	PF3D7_1448600	PBANKA_1312300		ND
1	PY17X_1317500	serine/threonine protein kinase, putative	A0A078KGC5	2.15111	2.27184	7	PF3D7_1450000	PBANKA_1313700		ND	√	√	yes
2	PY17X_1319300	sortilin, putative	A0A077Y8W3	3.35579	2.86553	21	PF3D7_1451800	PBANKA_1315500		3.57287	√
2	PY17X_1320000	syntaxin-6, putative	A0A078KGD1	3.24595	2.89865	6	PF3D7_1452500	PBANKA_1316200		10.9427			yes
1	PY17X_1323100	ferlin, putative	A0A077Y8S0	3.06321	2.3861	6	PF3D7_1455600	PBANKA_1319300		ND	√
1	PY17X_1325800	alpha/beta hydrolase, putative	A0A077Y917	1.56051	1.16306	10	PF3D7_1458300	PBANKA_1322000		ND	√		yes
2	PY17X_1326400	golgi apparatus membrane protein TVP23, putative	A0A078KDU5	2.3645	1.67563	4	PF3D7_1458900	PBANKA_1322600		ND	√
1	PY17X_1328100	inner membrane complex sub-compartment protein 3	A0A078KGN1	3.16979	2.28301	5	PF3D7_1460600	PBANKA_1324300	Hu et al., 2010; Poulin et al., 2013 Pb; Gao et al., 2018 Py; Kono et al., 2012; Wetzel et al., 2015	9.41067	√	√	yes
1	PY17X_1329800	GTP-binding protein, putative	A0A078KKG6	2.5885	2.88782	100	PF3D7_1462300	PBANKA_1326000		2.21733	√
2	PY17X_1332800	ATP synthase (C/AC39) subunit, putative	A0A078KKK7	3.23957	3.56352	56	PF3D7_1464700	PBANKA_1328100		ND	√
2	PY17X_1337000	conserved Plasmodium protein, unknown function	A0A078KGX0	4.71296	2.30612	5	PF3D7_1469100	PBANKA_1332300		ND	√		yes
2	PY17X_1341900	protein transport protein SFT2, putative	A0A078KEF2	3.77303	2.51602	8	PF3D7_1321800	PBANKA_1337200		ND		√
1	PY17X_1343600	glideosome associated protein with multiple membrane spans 1, putative	A0A078KH91	2.79793	1.93198	6	PF3D7_1323700	PBANKA_1338900	Bullen et al., 2009; Hu et al., 2010; Kono et al., 2012	ND			yes
2	PY17X_1346700	Qa-SNARE protein, putative	A0A077YBF5	1.80027	3.54947	6	PF3D7_1326800	PBANKA_1342000		ND
1	PY17X_1348200	conserved protein, unknown function	A0A078KLD7	2.38672	1.79605	19	PF3D7_1328300	PBANKA_1343500		ND
1	PY17X_1350100	DnaJ protein, putative	A0A077YAD8	5.91416	1.42662	6	PF3D7_1330300	PBANKA_1345300		ND
2	PY17X_1351100	signal peptidase complex catalytic subunit SEC11, putative	A0A078KEP7	3.47597	2.01973	9	PF3D7_1331300	PBANKA_1346200		3.0771
2	PY17X_1353100	AMMECR1 domain-containing protein, putative	A0A078KL40	1.22336	2.14867	13	PF3D7_1333400	PBANKA_1348100		ND	√
2	PY17X_1356900	LMBR1 domain-containing protein, putative	A0A4V0KSE1	4.1064	2.57577	4	PF3D7_1338000	PBANKA_1351700		ND	√
1	PY17X_1358700	ABC transporter B family member 5, putative	A0A077YAJ8	2.20906	2.92101	16	PF3D7_1339900	PBANKA_1353300		ND	√	√
2	PY17X_1359500	ras-related protein Rab-11B, putative	A0A078KL79	4.00565	5.83294	19	PF3D7_1340700	PBANKA_1354100		ND	√
2	PY17X_1360400	GPI mannosyltransferase 3, putative	A0A078KEW2	2.93895	3.13594	16	PF3D7_1341600	PBANKA_1354700		ND	√
1	PY17X_1361400	myosin A	A0A078KEW9	2.57113	3.05934	109	PF3D7_1342600	PBANKA_1355700	Baum et al., 2006; Siden-Kiamos et al., 2011; Robert-Paganin et al., 2019; Blake et al., 2020 Pb; Fang et al., 2018	ND
2	PY17X_1363400	aspartate carbamoyltransferase, putative	A0A078KEY6	1.89722	2.50115	15	PF3D7_1344800	PBANKA_1357700		3.2936	√	√
1	PY17X_1364200	inner membrane complex protein, putative	A0A077YBW1	4.47859	2.05004	13	PF3D7_1345600	PBANKA_1358500	Hu et al., 2010; Kono et al., 2012	4.9652			yes
2	PY17X_1364700	protein transport protein SEC61 subunit alpha, putative	A0A077YBW5	2.60241	1.6768	6	PF3D7_1346100	PBANKA_1359000		3.28497	√
1	PY17X_1365900	conserved Plasmodium protein, unknown function	A0A078KF05	2.55652	1.80109	3	PF3D7_1347400	PBANKA_1360200		ND	√	√
1	PY17X_1367100	conserved Plasmodium protein, unknown function	A0A078KHT3	2.36727	2.43905	20	PF3D7_1348600	PBANKA_1361400		ND	√
1	PY17X_1370900	conserved Plasmodium protein, unknown function	A0A078KLH7	1.53402	2.57982	77	PF3D7_1352400	PBANKA_1365100		ND	√		yes
1	PY17X_1402200	cytoadherence linked asexual protein, putative	A0A078KEG3	1.92755	2.55436	60	PF3D7_0220800	PBANKA_1400600		ND
2	PY17X_1402300	Plasmodium exported protein, unknown function	A0A078K872	1.91868	1.604	4	#N/A	PBANKA_1400700		ND
2	PY17X_1403600	sodium/hydrogen exchanger, putative	A0A078KEM0	1.40415	2.51006	25	PF3D7_1303500	PBANKA_1402000		ND
2	PY17X_1404300	CorA-like Mg2+ transporter protein, putative	A0A077YE31	2.03272	1.68792	5	PF3D7_1304200	PBANKA_1402700		ND	√
2	PY17X_1406400	conserved protein, unknown function	A0A077YE54	1.85876	1.94718	3	PF3D7_1306200	PBANKA_1404700		2.7603
2	PY17X_1407900	TOM1-like protein, putative	A0A077YE71	1.45697	1.99732	68	PF3D7_1307700	PBANKA_1406200		ND	√	√
2	PY17X_1410800	ER membrane protein complex subunit 7, putative	A0A078KEV9	4.72422	2.5075	5	PF3D7_1310500	PBANKA_1409000		2.8084
2	PY17X_1410900	ras-related protein Rab-5B, putative	A0A077YAY0	3.85262	1.52366	7	PF3D7_1310600	PBANKA_1409100		2.76013	√	√
1	PY17X_1411000	RNA-binding protein, putative	A0A077YE99	2.14344	3.30461	15	PF3D7_1310700	PBANKA_1409200		4.59857	√
2	PY17X_1412200	V-type proton ATPase catalytic subunit A, putative	A0A078KBJ6	1.09719	2.14264	30	PF3D7_1311900	PBANKA_1410400		ND	√
1	PY17X_1413700	conserved Plasmodium protein, unknown function	A0A078KBL4	1.54209	1.26456	2	PF3D7_1313500	PBANKA_1411900		ND	√
2	PY17X_1415500	conserved protein, unknown function	A0A077YEF0	3.38782	3.53494	32	PF3D7_1315300	PBANKA_1413800		ND	√
1	PY17X_1417000	protein transport protein SEC20, putative	A0A077YEG4	1.65685	2.2581	6	PF3D7_1316800	PBANKA_1415300		ND	√
2	PY17X_1419300	ubiquitin carboxyl-terminal hydrolase MINDY, putative	A0A078KF71	2.27867	2.74082	33	PF3D7_1319100	PBANKA_1417600		ND
2	PY17X_1420200	TBC domain protein, putative	A0A077YAL3	1.89924	3.3229	2	PF3D7_1320200	PBANKA_1418500		ND	√
2	PY17X_1420600	ras-related protein Rab-11A	A0A077YBK3	3.19323	2.60724	16	PF3D7_1320600	PBANKA_1418900		3.11787	√
2	PY17X_1420700	conserved Plasmodium protein, unknown function	A0A078KBP5	4.12708	2.16811	2	PF3D7_1320700	PBANKA_1419000		ND	√
2	PY17X_1421400	palmitoyltransferase DHHC8, putative	A0A078KF70	3.48088	3.03164	8	PF3D7_1321400	PBANKA_1419700		5.4095	√
1	PY17X_1421500	3',5'-cyclic nucleotide phosphodiesterase beta, putative	A0A077YEL3	1.26784	2.91226	13	PF3D7_1321500	PBANKA_1419800		ND	√
1	PY17X_1422000	conserved Plasmodium protein, unknown function	A0A077YEL7	2.89351	3.22668	25	PF3D7_0713700	PBANKA_1420300		ND	√		yes
1	PY17X_1424100	drug/metabolite transporter DMT1, putative	A0A078KFB6	2.45241	1.85536	2	PF3D7_0715800	PBANKA_1422100		ND	√
2	PY17X_1424300	FAD-dependent monooxygenase, putative	A0A078K8W2	2.64551	1.37051	3	PF3D7_0815300	PBANKA_1422300		ND
1	PY17X_1426000	PUB domain-containing protein, putative	A0A078KBS6	2.62553	3.67157	19	PF3D7_0813500	PBANKA_1424000		ND
2	PY17X_1428200	conserved protein, unknown function	A0A078KFD1	1.00973	1.80814	21	PF3D7_0811400	PBANKA_1426100		ND			yes
1	PY17X_1429300	protein phosphatase PPM5	A0A078K903	2.56461	2.55982	12	PF3D7_0810300	PBANKA_1427200		6.09163	√	√
1	PY17X_1430500	tetratricopeptide repeat protein, putative	A0A078KBV5	2.43399	2.14549	3	PF3D7_1212400	PBANKA_1428400		ND
2	PY17X_1430600	glycerol-3-phosphate 1-O-acyltransferase, putative	A0A078KFI0	2.32736	2.15938	10	PF3D7_1212500	PBANKA_1428500		2.45747	√
1	PY17X_1433900	serpentine receptor, putative	A0A078K945	3.33067	1.50071	4	PF3D7_1215900	PBANKA_1431600		ND	√
1	PY17X_1436400	phosphate translocator, putative	A0A077YD66	1.46632	2.17044	6	PF3D7_1218400	PBANKA_1434000		ND
1	PY17X_1437000	formin 2, putative	A0A4V0KTU0	2.33737	1.87055	2	PF3D7_1219000	PBANKA_1434600		ND	√
2	PY17X_1437200	aminophospholipid-transporting P-ATPase, putative	A0A077YC22	2.88675	2.85153	119	PF3D7_1219600	PBANKA_1434800		4.08833	√
2	PY17X_1439500	conserved Plasmodium protein, unknown function	A0A077YD91	1.77554	1.14256	7	PF3D7_1221900	PBANKA_1437100		ND		√
2	PY17X_1439800	endoplasmin, putative	A0A077YF64	0.968184	2.51778	37	PF3D7_1222300	PBANKA_1437300		ND	√
1	PY17X_1440100	glideosome-associated protein 45, putative	A0A077YD96	3.21349	2.16349	11	PF3D7_1222700	PBANKA_1437600	Baum et al., 2006; Fang et al., 2018	9.73573	√	√
1	PY17X_1440500	cAMP-dependent protein kinase regulatory subunit, putative	A0A077YB99	1.26889	2.00517	27	PF3D7_1223100	PBANKA_1438000		ND	√	√	yes
1	PY17X_1440800	phospholipid-transporting ATPase, putative	A0A4V0KTW3	2.11833	2.75138	132	PF3D7_1223400	PBANKA_1438300		6.38507	√		yes
1	PY17X_1441500	conserved protein, unknown function	A0A077YBB0	5.03517	2.91935	6	PF3D7_1224100	PBANKA_1439000		11.7019	√
1	PY17X_1441600	BRO1 domain-containing protein, putative	A0A077YDB2	1.00525	2.5449	13	PF3D7_1224200	PBANKA_1439100		ND
1	PY17X_1444500	potassium channel K1	A0A077YBD6	1.14859	2.12428	7	PF3D7_1227200	PBANKA_1442000		ND	√
1	PY17X_1446400	conserved Plasmodium protein, unknown function	A0A078KC83	2.22977	3.08654	58	#N/A	PBANKA_1443900		ND	√
2	PY17X_1447200	TBC domain-containing protein, putative	A0A4V0KU31	1.87362	3.05219	16	PF3D7_1230000	PBANKA_1444700		ND
2	PY17X_1447400	vacuolar transporter chaperone, putative	A0A078KC90	1.57677	2.68321	23	PF3D7_1230200	PBANKA_1444900		ND
2	PY17X_1448300	ras-related protein Rab-2, putative	A0A077YFE2	1.5104	2.31732	4	PF3D7_1231100	PBANKA_1445800		ND	√
2	PY17X_1453100	vesicle transport v-SNARE protein VTI1, putative	A0A078KG46	5.84837	1.34118	5	PF3D7_1236000	PBANKA_1450600		ND	√		yes
2	PY17X_1454500	hydrolase, putative	A0A077YCI7	1.17004	1.18224	4	PF3D7_1237400	PBANKA_1452000		ND		√
1	PY17X_1455600	sphingomyelin phosphodiesterase, putative	A0A077YBN3	2.06951	1.94444	8	PF3D7_1238600	PBANKA_1453100		ND	√
1	PY17X_1455800	acyl-CoA synthetase, putative	A0A077YC92	2.90906	3.32379	57	PF3D7_1238800	PBANKA_1453300		4.6292	√
2	PY17X_1456600	ATP-dependent zinc metalloprotease FTSH 1, putative	A0A077YBP4	3.13501	1.27764	14	PF3D7_1239700	PBANKA_1454100		ND
2	PY17X_1458900	syntaxin-16, putative	A0A077YFP5	4.08317	1.33504	5	PF3D7_1243000	PBANKA_1456400		ND
1	PY17X_1459300	vacuolar-sorting protein SNF7, putative	A0A077YCC9	2.84612	3.72842	14	PF3D7_1243500	PBANKA_1456800		ND
1	PY17X_1462100	myosin A-tail interacting protein	Q8WQZ5	3.55634	3.62342	14	PF3D7_1246400	PBANKA_1459500	Bergman et al., 2003 Py; Green et al., 2006; Dearnley et al., 2012; Fang et al., 2018	4.00587	√
1	PY17X_1463100	serine/threonine protein kinase, putative	A0A078KGJ8	1.49255	1.3443	12	PF3D7_1247500	PBANKA_1460500		ND	√
2	PY17X_1464100	conserved Plasmodium protein, unknown function	A0A077YCT4	3.75197	2.77713	4	PF3D7_1248600	PBANKA_1461500		ND	√
2	PY17X_1465700	CSC1-like protein, putative	A0A4V0KUH5	2.01581	2.82734	12	PF3D7_1250200	PBANKA_1463100		ND	√
1	PY17X_1466800	thymidylate kinase, putative	A0A078KA47	1.36714	1.47721	3	PF3D7_1251300	PBANKA_1464200		3.45185
