# Supplementary material for: Inner membrane complex proteomics reveals a palmitoylation regulation critical for intraerythrocytic development of malaria parasite
Source: eLife. 2022 Jul 1;11:e77447. doi: 10.7554/eLife.77447 (PMC9293000; doi:10.7554/eLife.77447)
Supplement: Supplementary file 2. [file elife-77447-supp2.xlsx]

## Sheet: Information of 188 proteins
Gene ID in P. yoelii	Protein Description	Protein ID in Uniprot	Log2(Tb-IMC/Tb-Cyto)	Adjusted P-value	Unique Peptide	Gene ortholog
						P. falciparum	P. berghei
PY17X_0107000	glutaredoxin-like protein	A0A078K295	1.37601	1.92391	13	PF3D7_0606900	PBANKA_0105500
PY17X_0108500	sorting assembly machinery 50 kDa subunit, putative	A0A077XYA0	3.37099	1.27631	3	PF3D7_0608310	PBANKA_0106950
PY17X_0113200	rhoptry protein ROP14, putative	A0A4V6MA08	3.43979	2.35139	8	PF3D7_0613300	PBANKA_0111600
PY17X_0113600	syntaxin-binding protein, putative	A0A078K325	1.43439	2.40404	8	PF3D7_0613700	PBANKA_0112000
PY17X_0114000	cytosolic Fe-S cluster assembly factor NAR1, putative	A0A4V0KF00	2.99112	1.99778	4	PF3D7_0614200	PBANKA_0112400
PY17X_0208600	V-type proton ATPase subunit C, putative	A0A078K3J4	1.39889	1.77414	17	PF3D7_0106100	PBANKA_0207200
PY17X_0209500	heptatricopeptide repeat and RAP domain-containing protein, putative	A0A077Y3B5	1.37828	1.57057	7	PF3D7_0105200	PBANKA_0208100
PY17X_0211300	nucleoside transporter 4, putative	A0A078K5T9	3.20448	2.22491	5	PF3D7_0103200	PBANKA_0209900
PY17X_0215700	AP-4 complex subunit beta, putative	A0A077Y049	1.88506	1.58584	8	PF3D7_0730200	PBANKA_0214300
PY17X_0303700	PCI domain-containing protein, putative	A0A078K3X0	1.78087	2.40862	3	PF3D7_0205400	PBANKA_0303100
PY17X_0305500	serine repeat antigen 3	A0A078K0J9	1.2053	1.34632	4	PF3D7_0207800	PBANKA_0304800
PY17X_0306500	conserved Plasmodium protein, unknown function	A0A077Y0C2	1.57969	2.00275	3	PF3D7_0208800	PBANKA_0305900
PY17X_0306800	patatin-like phospholipase 1, putative	A0A078K6N7	2.46593	2.04244	36	PF3D7_0209100	PBANKA_0306200
PY17X_0313600	vacuolar protein sorting-associated protein 45, putative	A0A078K3L1	2.15286	3.92703	60	PF3D7_0216400	PBANKA_0313100
PY17X_0314300	ATP synthase subunit alpha, mitochondrial, putative	A0A078K6U6	1.58985	2.4113	22	PF3D7_0217100	PBANKA_0313800
PY17X_0315100	thioesterase/thiol ester dehydrase-isomerase, putative	A0A078K3M6	1.09217	1.27222	4	PF3D7_0217900	PBANKA_0314600
PY17X_0403800	N-ethylmaleimide-sensitive fusion protein, putative	A0A078K4B8	1.30648	1.55946	35	PF3D7_0303000	PBANKA_0401600
PY17X_0406000	transporter, putative	A0A4V0KFV7	3.37542	3.62016	41	PF3D7_0305300	PBANKA_0403800
PY17X_0406600	cytochrome b-c1 complex subunit 8, putative	A0A077XZY8	2.39342	1.435	2	PF3D7_0306000	PBANKA_0404400
PY17X_0407100	cytochrome c oxidase subunit ApiCOX35, putative	A0A078K167	3.94915	2.379	3	PF3D7_0306500	PBANKA_0404900
PY17X_0417400	40S ribosomal protein S15A, putative	A0A078K7F6	1.56455	1.85465	8	PF3D7_0316800	PBANKA_0414600
PY17X_0418800	high molecular weight rhoptry protein 3, putative	A0A077Y4R0	1.65908	2.78375	30	PF3D7_0905400	PBANKA_0416000
PY17X_0419800	signal peptidase complex subunit 3, putative	A0A077Y4S2	2.77162	1.51035	5	PF3D7_0904400	PBANKA_0417000
PY17X_0420100	AP-4 complex subunit epsilon, putative	A0A077Y2K3	1.24082	2.71199	44	PF3D7_0904100	PBANKA_0417300
PY17X_0507600	ZIP domain-containing protein	A0A078K7M4	3.59396	2.82966	3	PF3D7_1022300	PBANKA_0506500
PY17X_0510100	exported protein 3, putative	A0A4V0KHE4	3.96557	1.66221	6	PF3D7_1024800	PBANKA_0509000
PY17X_0510900	cytochrome c oxidase copper chaperone, putative	A0A078K586	2.36411	1.35669	3	PF3D7_1025600	PBANKA_0509800
PY17X_0513300	protoporphyrinogen oxidase, putative	A0A077Y1P4	3.09938	2.87508	31	PF3D7_1028100	PBANKA_0512200
PY17X_0514500	LEM3/CDC50 family protein, putative	A0A077Y0W0	2.83448	3.0035	25	PF3D7_1029400	PBANKA_0513400
PY17X_0514700	adenosine deaminase, putative	A0A077Y254	1.23252	3.88113	11	PF3D7_1029600	PBANKA_0513600
PY17X_0521300	ADP/ATP transporter on adenylate translocase, putative	A0A077Y3F4	1.44391	2.15455	15	PF3D7_1037300	PBANKA_0520200
PY17X_0524200	40S ribosomal protein S19, putative	A0A077Y155	1.32017	2.24821	7	PF3D7_0422400	PBANKA_0522800
PY17X_0607800	eukaryotic translation initiation factor 5, putative	A0A078KD20	1.2613	2.3291	17	PF3D7_1206700	PBANKA_0605300
PY17X_0612900	non-SERCA-type Ca2+ -transporting P-ATPase, putative	A0A4V6MAB3	3.02236	3.60849	47	PF3D7_1211900	PBANKA_0610400
PY17X_0619900	40S ribosomal protein S10, putative	A0A078KAL2	1.08827	1.6354	5	PF3D7_0719700	PBANKA_0617200
PY17X_0620900	phosphoinositide-binding protein, putative	A0A4V0KID1	2.34062	2.68675	57	PF3D7_0720700	PBANKA_0618200
PY17X_0621600	rhoptry protein, putative	A0A078KDE1	1.0758	1.92627	11	PF3D7_0721400	PBANKA_0618900
PY17X_0624400	type 2A phosphatase-associated protein 42, putative	A0A077Y643	1.489	1.85071	5	PF3D7_0724200	PBANKA_0621700
PY17X_0624600	mitochondrial import inner membrane translocase subunit TIM14, putative	A0A077Y2P3	4.38437	1.90059	3	PF3D7_0724400	PBANKA_0621900
PY17X_0704200	receptor for activated c kinase, putative	A0A078K5Q9	1.01536	2.05219	41	PF3D7_0826700	PBANKA_0703900
PY17X_0706300	Fe-S cluster assembly protein DRE2, putative	A0A078K8L6	2.07696	2.44929	12	PF3D7_0824600	PBANKA_0706000
PY17X_0706500	nucleoside transporter 2, putative	A0A077Y4J5	3.09399	2.16168	14	PF3D7_0824400	PBANKA_0706200
PY17X_0717100	armadillo-domain containing rhoptry protein, putative	A0A078K5M7	2.05091	2.49155	7	PF3D7_0414900	PBANKA_0716900
PY17X_0809600	conserved protein, unknown function	A0A077Y3E2	3.26314	3.44624	10	PF3D7_0318900	PBANKA_0806400
PY17X_0811500	E3 ubiquitin-protein ligase, putative	A0A078K674	4.23985	2.17301	19	PF3D7_0316900	PBANKA_0808300
PY17X_0812000	GTPase-activating protein, putative	A0A4V0KJJ7	1.37466	1.95853	10	PF3D7_0907200	PBANKA_0808700
PY17X_0812200	ATP-dependent protease ATPase subunit ClpY, putative	A0A077Y5A2	1.13252	1.95794	3	PF3D7_0907400	PBANKA_0808900
PY17X_0813500	conserved Plasmodium protein, unknown function	A0A077Y445	1.86576	2.73782	16	PF3D7_0909000	PBANKA_0810200
PY17X_0813800	apoptosis-related protein, putative	A0A077Y353	1.76159	2.07504	9	PF3D7_0909300	PBANKA_0810500
PY17X_0814200	FHA domain protein, putative	A0A078K9N2	1.34413	1.81968	12	PF3D7_0909700	PBANKA_0810900
PY17X_0814800	conserved protein, unknown function	A0A077Y369	2.29181	1.73658	2	PF3D7_0910300	PBANKA_0811500
PY17X_0815200	cytosolic Fe-S cluster assembly factor NBP35, putative	A0A078K9P2	1.87374	2.53211	9	PF3D7_0910800	PBANKA_0811900
PY17X_0820000	cytochrome c oxidase subunit ApiCOX30, putative	A0A078K6C2	5.11573	2.03807	5	PF3D7_0915700	PBANKA_0816700
PY17X_0822600	eukaryotic translation initiation factor 3 subunit F, putative	A0A077Y3R9	1.10766	2.09758	13	PF3D7_0918300	PBANKA_0819300
PY17X_0827400	nitric oxide synthase, putative	A0A077Y7Q0	1.40305	2.68347	7	PF3D7_0923200	PBANKA_0824100
PY17X_0828200	patatin-like phospholipase, putative	A0A4V0KK30	2.37593	2.291	20	PF3D7_0924000	PBANKA_0824900
PY17X_0830800	glutamine-dependent NAD(+) synthetase, putative	A0A078K9N8	1.179	1.76675	16	PF3D7_0926700	PBANKA_0827500
PY17X_0831900	cytochrome c oxidase subunit 5B, putative	A0A078K3K9	4.16763	3.36622	4	PF3D7_0927800	PBANKA_0828600
PY17X_0832100	cytochrome c oxidase subunit 6B, putative	A0A078K727	3.80826	1.46346	4	PF3D7_0928000	PBANKA_0828800
PY17X_0833500	high molecular weight rhoptry protein 2	A0A4V0KKV1	1.72982	3.01306	87	PF3D7_0929400	PBANKA_0830200
PY17X_0834500	zinc finger protein, putative	A0A078K6S0	2.68691	1.35692	2	PF3D7_0930400	PBANKA_0831100
PY17X_0837800	mitochondrial-processing peptidase subunit beta, putative	A0A078KA98	1.64992	3.19267	10	PF3D7_0933600	PBANKA_0834400
PY17X_0902800	ATP synthase subunit delta, mitochondrial, putative	A0A077Y6B6	1.4059	1.33465	2	PF3D7_1147700	PBANKA_0901400
PY17X_0911700	guanylyl cyclase alpha, putative	A0A078K7N5	1.20697	2.30964	26	PF3D7_1138400	PBANKA_0910300
PY17X_0915900	heat shock protein 70, putative	A0A078KAZ3	1.10021	2.5439	31	PF3D7_1134000	PBANKA_0914400
PY17X_0916500	apical membrane antigen 1	A0A078KAI4	1.51194	2.20025	35	PF3D7_1133400	PBANKA_0915000
PY17X_0917500	conserved Plasmodium protein, unknown function	A0A078KAJ3	2.50249	1.79481	7	PF3D7_1132400	PBANKA_0916000
PY17X_0920000	major facilitator superfamily-related transporter, putative	A0A077Y4V2	3.60782	3.51183	9	PF3D7_1129900	PBANKA_0918300
PY17X_0921800	Fe-S cluster assembly protein, putative	A0A078K4J8	1.04996	2.33332	4	PF3D7_1128500	PBANKA_0919700
PY17X_0923400	protein phosphatase, putative	A0A077Y5J9	3.52515	2.75131	21	PF3D7_1127000	PBANKA_0921400
PY17X_0924100	40S ribosomal protein S18, putative	A0A078KB66	1.04198	2.19262	7	PF3D7_1126200	PBANKA_0922100
PY17X_0928000	conserved Plasmodium protein, unknown function	A0A078K7Z9	5.15318	1.21226	3	PF3D7_1122300	PBANKA_0926000
PY17X_0932300	GTP-binding nuclear protein RAN/TC4, putative	A0A077Y8Z4	1.36486	2.44103	27	PF3D7_1117700	PBANKA_0930300
PY17X_0933300	dipeptidyl aminopeptidase 1, putative	A0A077Y902	1.73003	1.21886	6	PF3D7_1116700	PBANKA_0931300
PY17X_0942000	DNA repair protein RAD51	A0A077Y5J5	1.03481	2.55105	5	PF3D7_1107400	PBANKA_0939500
PY17X_0943600	conserved Apicomplexan protein, unknown function	A0A077Y7C9	1.70162	2.1942	9	PF3D7_1105800	PBANKA_0941100
PY17X_0944600	metabolite/drug transporter, putative	A0A077Y7D5	3.24184	2.01424	5	PF3D7_1104800	PBANKA_0942100
PY17X_0945100	conserved Plasmodium protein, unknown function	A0A4V0KKK7	3.77346	1.62209	5	PF3D7_1104300	PBANKA_0942600
PY17X_0945300	syntaxin, putative	A0A077Y9F5	3.99096	3.29952	30	PF3D7_1104100	PBANKA_0942800
PY17X_1004700	TMEM33 domain-containing protein, putative	A0A078KF18	3.8913	4.0438	3	PF3D7_0405600	PBANKA_1003300
PY17X_1004900	conserved protein, unknown function	A0A077YFM5	2.97506	2.61356	2	PF3D7_0405800	PBANKA_1003500
PY17X_1005200	V-type proton ATPase subunit B, putative	A0A077YF83	1.1723	2.75447	36	PF3D7_0406100	PBANKA_1003800
PY17X_1008500	NAD(P)-binding protein, putative	A0A078KIG0	2.31764	1.42094	3	PF3D7_0409500	PBANKA_1007100
PY17X_1010400	glucose-6-phosphate isomerase, putative	A0A078KF65	1.41419	2.93382	5	PF3D7_1436000	PBANKA_1008800
PY17X_1012400	CCR4-associated factor 16, putative	A0A078KF85	1.31756	1.89304	16	PF3D7_1434000	PBANKA_1010800
PY17X_1015300	cytochrome c oxidase subunit 2B, putative	A0A078KC85	3.02126	2.29773	3	PF3D7_1430900	PBANKA_1013800
PY17X_1017800	proliferation-associated protein 2g4, putative	A0A077YHB9	1.32012	2.11844	7	PF3D7_1428300	PBANKA_1016300
PY17X_1019600	ABC transporter G family member 2, putative	A0A077YG45	1.48483	1.80089	4	PF3D7_1426500	PBANKA_1018100
PY17X_1024100	DIX domain-containing protein, putative	A0A078KIX7	1.28934	1.46853	19	PF3D7_1421000	PBANKA_1022200
PY17X_1025900	thioredoxin-like protein, putative	A0A078KF78	2.7443	3.37171	13	PF3D7_1419200	PBANKA_1024000
PY17X_1027100	ubiquitin fusion degradation protein 1, putative	A0A078KJ09	1.41628	1.54003	3	PF3D7_1418000	PBANKA_1024700
PY17X_1032200	glycylpeptide N-tetradecanoyltransferase, putative	A0A078KCS4	3.51939	3.38081	17	PF3D7_1412800	PBANKA_1029800
PY17X_1034500	rhoptry-associated protein 1	A0A078KJI1	1.2507	2.03415	29	PF3D7_1410400	PBANKA_1032100
PY17X_1034900	ER membrane protein complex subunit 2, putative	A0A078KFH8	3.88917	2.22638	4	PF3D7_1410000	PBANKA_1032500
PY17X_1036800	plasmepsin IV	A0A077YJQ2	1.18687	2.38088	38	PF3D7_1407800	PBANKA_1034400
PY17X_1039100	COBW domain-containing protein 1, putative	A0A078KJH5	1.26267	2.78739	2	PF3D7_1405500	PBANKA_1036700
PY17X_1040400	cytochrome c, putative	A0A077YGK0	1.1854	1.73155	9	PF3D7_1404100	PBANKA_1038000
PY17X_1102500	rhoptry-associated protein 2/3	A0A078K5A9	1.49006	1.73068	14	#N/A	PBANKA_1101400
PY17X_1104700	cation transporting P-ATPase, putative	A0A4V0KM25	2.53092	2.45787	41	PF3D7_0504000	PBANKA_1103600
PY17X_1108400	nuclear protein localization protein 4, putative	A0A078KBP8	1.35646	2.03031	15	PF3D7_0507700	PBANKA_1107300
PY17X_1117700	mitochondrial import receptor subunit TOM40, putative	A0A078KC27	1.68631	2.03909	9	PF3D7_0617000	PBANKA_1116500
PY17X_1118900	rhomboid protease ROM10	A0A077Y6V6	5.21817	2.50373	4	PF3D7_0618600	PBANKA_1117800
PY17X_1122500	radical SAM protein, putative	A0A077Y632	1.78432	2.05665	25	PF3D7_0622200	PBANKA_1121100
PY17X_1122600	vacuolar transporter chaperone, putative	A0A4V0KQ31	1.16942	1.62746	11	PF3D7_0622300	PBANKA_1121200
PY17X_1128400	eukaryotic translation initiation factor 2-alpha kinase	A0A4V0KMM4	1.26496	2.1429	39	PF3D7_0628200	PBANKA_1126900
PY17X_1129800	amino acid transporter AAT1, putative	A0A078K961	4.50056	4.47636	5	PF3D7_0629500	PBANKA_1128300
PY17X_1131700	reactive oxygen species modulator 1, putative	A0A078K660	4.14641	1.37979	3	PF3D7_1353700	PBANKA_1130300
PY17X_1136700	GTP-binding protein, putative	A0A077YAJ3	1.05967	4.46275	5	PF3D7_1358900	PBANKA_1135200
PY17X_1139400	cytochrome c oxidase subunit ApiCOX24, putative	A0A077Y6P1	2.91915	1.98251	4	PF3D7_1362000	PBANKA_1138000
PY17X_1140800	polyubiquitin binding protein, putative	A0A078K6G9	1.26857	1.91409	3	PF3D7_1363400	PBANKA_1139400
PY17X_1143800	signal recognition particle receptor subunit alpha, putative	A0A077Y7Q5	2.97271	2.39148	29	PF3D7_1366600	PBANKA_1142500
PY17X_1147600	membrane associated histidine-rich protein 1a	A0A077Y6X9	1.11657	1.1274	8	#N/A	PBANKA_1145800
PY17X_1208000	phosducin-like protein 3	A0A077YB07	1.35592	1.94837	10	PF3D7_1006600	PBANKA_1204800
PY17X_1211900	succinate dehydrogenase subunit 4, putative	A0A077Y799	4.67001	3.25242	3	PF3D7_1010300	PBANKA_1208700
PY17X_1212800	BET1-like protein, putative	A0A078KDJ9	1.92916	2.38151	9	PF3D7_1011200	PBANKA_1209600
PY17X_1214500	autophagy-related protein 18, putative	A0A078K787	1.25177	2.37421	13	PF3D7_1012900	PBANKA_1211300
PY17X_1217500	enolase, putative	A0A077YB79	1.07642	1.71129	75	PF3D7_1015900	PBANKA_1214300
PY17X_1221400	T-complex protein 1 subunit epsilon, putative	A0A077Y7J8	1.18973	1.32213	17	PF3D7_0320300	PBANKA_1218200
PY17X_1222000	ABC transporter I family member 1, putative	A0A078K7E7	2.52199	2.33324	58	PF3D7_0319700	PBANKA_1218800
PY17X_1222700	chloroquine resistance transporter, putative	A0A077Y7I0	3.90798	2.13673	30	PF3D7_0709000	PBANKA_1219500
PY17X_1223500	lysophospholipase, putative	A0A077YBB9	1.6794	2.97624	16	PF3D7_0709700	PBANKA_1220300
PY17X_1226000	tyrosine--tRNA ligase, putative	A0A4V0KQH6	2.68586	1.45828	2	PF3D7_0807900	PBANKA_1222800
PY17X_1226500	ras-related protein Rab-18, putative	A0A078K7H4	1.40793	2.61222	11	PF3D7_0807300	PBANKA_1223300
PY17X_1227400	DnaJ protein, putative	A0A4V0KQ69	1.72656	2.59702	23	PF3D7_0806500	PBANKA_1224200
PY17X_1230200	AAA family ATPase, putative	A0A077Y7S8	1.08696	1.24682	14	PF3D7_0803500	PBANKA_1226700
PY17X_1231500	1-cys peroxiredoxin, putative	Q86SB3	1.13848	1.92497	16	PF3D7_0802200	PBANKA_1228000
PY17X_1231900	mannose-6-phosphate isomerase, putative	A0A077Y8P0	2.20825	2.90299	26	PF3D7_0801800	PBANKA_1228400
PY17X_1233200	conserved Plasmodium protein, unknown function	A0A4V0KP05	1.01358	2.128	3	PF3D7_0615000	PBANKA_1229700
PY17X_1241000	multidrug resistance protein 1, putative	A0A078KB04	4.23112	3.54408	193	PF3D7_0523000	PBANKA_1237800
PY17X_1241100	mitochondrial-processing peptidase subunit alpha, putative	A0A077Y814	2.09651	1.8683	13	PF3D7_0523100	PBANKA_1237900
PY17X_1241300	cytochrome c oxidase subunit ApiCOX18, putative	A0A078K7U6	2.16402	1.58694	2	PF3D7_0523300	PBANKA_1238100
PY17X_1241800	divalent metal transporter, putative	A0A077Y877	3.30635	2.76986	26	PF3D7_0523800	PBANKA_1238600
PY17X_1242800	ubiquitin fusion degradation protein 1, putative	A0A078K7W1	1.35569	2.5789	5	PF3D7_0524800	PBANKA_1239600
PY17X_1242900	S-adenosyl-L-methionine-dependent tRNA 4-demethylwyosine synthase, putative	A0A078KAW8	1.14527	1.56581	7	PF3D7_0524900	PBANKA_1239700
PY17X_1245400	conserved Plasmodium protein, unknown function	A0A077YBZ6	2.77808	2.49122	8	PF3D7_0527400	PBANKA_1242200
PY17X_1247000	conserved Plasmodium protein, unknown function	A0A077Y8E2	2.97806	2.66615	20	PF3D7_0529000	PBANKA_1243600
PY17X_1248000	SNARE protein, putative	A0A077YA80	2.80525	2.97919	13	PF3D7_0530100	PBANKA_1244500
PY17X_1307100	cytochrome b-c1 complex subunit Rieske, putative	A0A078KJT6	2.45475	2.61108	5	PF3D7_1439400	PBANKA_1303300
PY17X_1309500	vacuolar protein sorting-associated protein 60, putative	A0A078KK46	1.69909	1.48638	2	PF3D7_1441800	PBANKA_1305700
PY17X_1317600	signal recognition particle subunit SRP54, putative	A0A078KKE1	1.44562	2.57742	34	PF3D7_1450100	PBANKA_1313800
PY17X_1318500	conserved Plasmodium protein, unknown function	A0A078KGD8	1.0703	1.70967	12	PF3D7_1451000	PBANKA_1314700
PY17X_1319500	rhoptry neck protein 2	A0A4V0KR34	1.27748	2.16703	36	PF3D7_1452000	PBANKA_1315700
PY17X_1324300	V-type H(+)-translocating pyrophosphatase, putative	A0A078KKA6	3.04163	3.62035	15	PF3D7_1456800	PBANKA_1320500
PY17X_1325500	berghepain-1	A0A077Y9L7	3.66287	3.69365	26	PF3D7_1458000	PBANKA_1321700
PY17X_1327500	FYVE and coiled-coil domain-containing protein, putative	A0A078KGK5	3.15499	3.1464	30	PF3D7_1460100	PBANKA_1323700
PY17X_1330100	cytochrome c1, heme protein, mitochondrial, putative	A0A077Y8Z0	2.40288	2.41689	5	PF3D7_1462700	PBANKA_1326300
PY17X_1333100	cytochrome c oxidase subunit ApiCOX25, putative	A0A078KGU6	3.70197	2.07531	4	PF3D7_1465000	PBANKA_1328400
PY17X_1339100	inorganic anion antiporter, putative	A0A078KH14	4.53921	2.38295	16	PF3D7_1471200	PBANKA_1334400
PY17X_1340200	conserved protein, unknown function	A0A078KL39	4.59372	2.20546	8	PF3D7_1472300	PBANKA_1335500
PY17X_1343700	vacuolar protein sorting-associated protein 52, putative	A0A4V0KS09	1.45789	2.02574	17	PF3D7_1323800	PBANKA_1339000
PY17X_1344600	SNARE protein, putative	A0A078KHA0	1.8342	2.3619	24	PF3D7_1324700	PBANKA_1339900
PY17X_1344700	dihydrofolate synthase/folylpolyglutamate synthase, putative	A0A077YBC4	1.26527	3.95927	3	PF3D7_1324800	PBANKA_1340000
PY17X_1345000	phosphoribosylpyrophosphate synthetase, putative	A0A078KH75	1.14865	2.1071	8	PF3D7_1325100	PBANKA_1340300
PY17X_1351800	Qa-SNARE protein, putative	A0A077YAE7	2.462	2.61893	15	PF3D7_1332000	PBANKA_1346800
PY17X_1359700	sodium-dependent phosphate transporter, putative	A0A078KHK9	2.0283	1.34644	2	PF3D7_1340900	PBANKA_1354300
PY17X_1364300	isocitrate dehydrogenase [NADP], mitochondrial, putative	A0A077YAB3	2.27618	2.02384	3	PF3D7_1345700	PBANKA_1358600
PY17X_1369900	60S ribosomal protein L17, putative	A0A078KF40	1.02538	2.10115	8	PF3D7_1351400	PBANKA_1364200
PY17X_1370600	ABC transporter B family member 6, putative	A0A077YAT7	2.63055	2.3366	3	PF3D7_1352100	PBANKA_1364800
PY17X_1402900	40S ribosomal protein S7, putative	A0A077YB06	1.13067	2.00268	18	PF3D7_1302800	PBANKA_1401300
PY17X_1403300	SNARE protein, putative	A0A077YE20	3.95574	1.79301	9	PF3D7_1303200	PBANKA_1401700
PY17X_1409500	protein phosphatase PPM6	A0A077YE85	1.96783	3.27874	10	PF3D7_1309200	PBANKA_1407700
PY17X_1410100	conserved protein, unknown function	A0A077YB92	1.776	1.36956	3	PF3D7_1309800	PBANKA_1408300
PY17X_1410300	ATP synthase subunit O, mitochondrial, putative	A0A077YCG6	2.39099	2.25568	2	PF3D7_1310000	PBANKA_1408500
PY17X_1411600	ATP synthase subunit gamma, mitochondrial, putative	A0A077YBA8	1.87626	2.07471	5	PF3D7_1311300	PBANKA_1409800
PY17X_1415200	conserved Plasmodium protein, unknown function	A0A077YAF3	4.04722	3.25034	9	PF3D7_1315000	PBANKA_1413500
PY17X_1415700	conserved protein, unknown function	A0A4V0KT93	2.59205	1.8519	2	PF3D7_1315500	PBANKA_1414000
PY17X_1416800	choline-phosphate cytidylyltransferase	A0A078KF48	1.33874	2.68513	33	PF3D7_1316600	PBANKA_1415100
PY17X_1419000	translocation protein SEC63, putative	A0A078K8S4	1.62331	2.81456	27	PF3D7_1318800	PBANKA_1417300
PY17X_1420000	golgi protein 1, putative	A0A078K8T2	1.89256	2.06671	4	PF3D7_1320000	PBANKA_1418300
PY17X_1420500	SNARE protein, putative	A0A078K8T6	1.98227	1.85309	6	PF3D7_1320500	PBANKA_1418800
PY17X_1421200	conserved protein, unknown function	A0A077YAM3	2.65157	2.10004	2	PF3D7_1321200	PBANKA_1419500
PY17X_1422600	palmitoyltransferase DHHC4, putative	A0A077YBM3	3.2133	1.72518	3	PF3D7_0714300	PBANKA_1420900
PY17X_1424200	cation diffusion facilitator family protein, putative	A0A4V0KTK6	3.02038	3.20395	29	PF3D7_0715900	PBANKA_1422200
PY17X_1428400	ER membrane protein complex subunit 1, putative	A0A077YEW1	1.70258	3.52482	26	PF3D7_0811200	PBANKA_1426300
PY17X_1429200	aquaporin, putative	A0A078KFE2	1.44201	1.60622	12	PF3D7_0810400	PBANKA_1427100
PY17X_1433300	10 kDa chaperonin, putative	A0A078KFI2	3.20461	3.08523	7	PF3D7_1215300	PBANKA_1431050
PY17X_1434400	conserved Plasmodium protein, unknown function	A0A078K951	3.24727	1.69788	10	PF3D7_1216400	PBANKA_1432100
PY17X_1443100	VAC14 domain-containing protein, putative	A0A077YDC7	1.62387	2.43186	51	PF3D7_1225700	PBANKA_1440600
PY17X_1444200	parasitophorous vacuolar protein 2	A0A078K9D9	1.38078	1.71204	3	PF3D7_1226900	PBANKA_1441700
PY17X_1445000	elongator complex protein 3, putative	A0A078KFW8	2.01256	3.1848	53	PF3D7_1227800	PBANKA_1442500
PY17X_1446300	multidrug resistance-associated protein 2	A0A078KCM4	2.0726	2.62035	48	PF3D7_1229100	PBANKA_1443800
PY17X_1448700	mitosis protein dim1, putative	A0A077YC24	3.28025	2.45634	2	PF3D7_1231500	PBANKA_1446200
PY17X_1449500	cytochrome b5, putative	A0A077YBH1	1.98236	1.21482	4	PF3D7_1232300	PBANKA_1447000
PY17X_1452800	ATP synthase subunit beta, mitochondrial	A0A078KCT3	2.02158	3.72542	28	PF3D7_1235700	PBANKA_1450300
PY17X_1454800	conserved protein, unknown function	A0A077YC80	3.13812	2.94976	2	PF3D7_1237700	PBANKA_1452300
PY17X_1458700	rab specific GDP dissociation inhibitor, putative	A0A078K9T5	1.64513	3.71063	15	PF3D7_1242800	PBANKA_1456200
PY17X_1462000	clathrin adaptor domain-containing protein, putative	A0A078KCM1	1.76786	2.69716	41	PF3D7_1246300	PBANKA_1459400
PY17X_1462400	conserved Plasmodium protein, unknown function	A0A078KD43	2.66516	3.31782	3	PF3D7_1246700	PBANKA_1459800
