# Supplementary material for: Inner membrane complex proteomics reveals a palmitoylation regulation critical for intraerythrocytic development of malaria parasite
Source: eLife. 2022 Jul 1;11:e77447. doi: 10.7554/eLife.77447 (PMC9293000; doi:10.7554/eLife.77447)
Supplement: Supplementary file 3. [file elife-77447-supp3.xlsx]

## Sheet: Sheet2
Primers for gene tagging
Gene name	Tag	Gene ID	Left homologous arm		Right homologous arm		Target site of sgRNA
			Forward primer	Rerverse primer	Forward primer	Reverse primer	Oligo (Forward)	Oligo (Reverse)
dhhc1	C-terminal 6HA	PY17X_0404200	CGGGGTACCGCACCCCTATATATTAATGC	CATGCCATGGTACGGTATCTGGAACTAGC	CCGCTCGAGGGGGTTACCCAATCTTATT	CCCCTTAAGCGGTACGGTATTAAAACGAA	TATTGGAAAGTGGAAAGTGGAAAG	AAACCTTTCCACTTTCCACTTTCC
dhhc1	C-terminal mAID-2HA	PY17X_0404200	CGGGGTACCGCACCCCTATATATTAATGC	CATGCCATGGTACGGTATCTGGAACTAGC	CCGCTCGAGGGGGTTACCCAATCTTATT	CCCCTTAAGCGGTACGGTATTAAAACGAA	TATTGGAAAGTGGAAAGTGGAAAG	AAACCTTTCCACTTTCCACTTTCC
dhhc2	C-terminal 6HA	PY17X_0109900	CGGGGTACCGCTACCCAAACTTTTCATTATAT	CATGCCATGGGTATATTATTTCCATGTGATATGC	CCGCTCGAGGAGCTTATAACATTTCATAA	CCGGAATTCGTGTGTGTGTGTGTATAAATA	TATTTGGAGAGTTAGCATATCACA	AAACTGTGATATGCTAACTCTCCA
dhhc2	C-terminal 4Myc	PY17X_0109900	CGGGGTACCGCTACCCAAACTTTTCATTATAT	CATGCCATGGGTATATTATTTCCATGTGATATGC	CCGCTCGAGGAGCTTATAACATTTCATAA	CCGGAATTCGTGTGTGTGTGTGTATAAATA	TATTTGGAGAGTTAGCATATCACA	AAACTGTGATATGCTAACTCTCCA
dhhc2	N-terminal 6HA	PY17X_0109900	CGGGGTACCTCGTAATACATTTATTATTTAAGT	CATGCCATGGTTTTTATATTGGTTGTGGTT	CCGCTCGAGCAATGACACATAAATATATGCAGAT	CCCCTTAAGTTCTATCTGGCTTCCATACAT	TATTGGAAAAGTTCCGAGAAATTG	AAACCAATTTCTCGGAACTTTTCC
dhhc2	N-terminal GFP	PY17X_0109900	CGGGGTACCTCGTAATACATTTATTATTTAAGT	CATGCCATGGTTTTTATATTGGTTGTGGTT	CCGCTCGAGCAATGACACATAAATATATGCAGAT	CCCCTTAAGTTCTATCTGGCTTCCATACAT	TATTGGAAAAGTTCCGAGAAATTG	AAACCAATTTCTCGGAACTTTTCC
dhhc2	N-terminal mAID-2HA	PY17X_0109900	CGGGGTACCTCGTAATACATTTATTATTTAAGT	CATGCCATGGTTTTTATATTGGTTGTGGTT	CCGCTCGAGCAATGACACATAAATATATGCAGAT	CCCCTTAAGTTCTATCTGGCTTCCATACAT	TATTGGAAAAGTTCCGAGAAATTG	AAACCAATTTCTCGGAACTTTTCC
phil1	C-terminal 4Myc	PY17X_0206000	CGGGGTACCCAACATCGAGAAAAAGATATAGT	CATGCCATGGCATATTATCTTTAGGGCATTCT	CCGCTCGAGGTCATAGAAATTTGTTTTTGTCC	CCCCTTAAGCATATAACTTTTAAAATGGACTTAT	TATTGATGTTTCATATAAGTTCGG	AAACCCGAACTTATATGAAACATC
Primers for PCR-genotyping parasites with gene tagging
Gene name	Tag	Gene ID	P1	P2	P3	P4
dhhc1	C-terminal 6HA	PY17X_0404200	CTTATTTGCACGTAACACAA	CGGTACGGTATTAAAACGAA	GCACCCCTATATATTAATGC	TAAAACGGGCTTGTAGTTAT
dhhc1	C-terminal mAID-2HA	PY17X_0404200	CTTATTTGCACGTAACACAA	CGGTACGGTATTAAAACGAA	GCACCCCTATATATTAATGC	TAAAACGGGCTTGTAGTTAT
dhhc2	C-terminal 6HA	PY17X_0109900	CCAGATAGAACACATCATTG	GAAAGGGAATTGAAAACTTC	TTTCGAATAGACCAGCAGGA	TATTCATTTGGCTTTCTGTG
dhhc2	C-terminal 4Myc	PY17X_0109900	CCAGATAGAACACATCATTG	GAAAGGGAATTGAAAACTTC	TTTCGAATAGACCAGCAGGA	TATTCATTTGGCTTTCTGTG
phil1	C-terminal 4Myc	PY17X_0206000	AATTTTAAACTTTAGATGCT	CATATAACTTTTAAAATGGAC	CAACATCGAGAAAAAGATAT	TTAATTCAAATGAAGCCAAT
Gene name	Tag	Gene ID	P5	P6	P7	P8
dhhc2	N-terminal 6HA	PY17X_0109900	TATGCATATGCATGTATAT	GAATCGTAGCACATATGCTT	GGAAATTAGTTATACTGCTA	ACATTTGCAAAGCTTTAGAT
dhhc2	N-terminal GFP	PY17X_0109900	TATGCATATGCATGTATAT	GAATCGTAGCACATATGCTT	GGAAATTAGTTATACTGCTA	ACATTTGCAAAGCTTTAGAT
dhhc2	N-terminal mAID-2HA	PY17X_0109900	TATGCATATGCATGTATAT	GAATCGTAGCACATATGCTT	GGAAATTAGTTATACTGCTA	ACATTTGCAAAGCTTTAGAT
Primes for RT-qPCR
Gene name	Gene ID	Forward Primer	Reverse Primer	Product Size (bp)
dhhc1	PY17X_0404200	CCCGAGGAATGTGTGTGTTA	TTGATGGACAATGCAATGGAAG	88
dhhc2	PY17X_0109900	GGATGTGAAGATAATGCCAAGC	CCATCTCCTGCTGGTCTATTC	95
dhhc3	PY17X_0929300	GAGCTTACAACGACGCATTATTC	GTGCAACCCAAAGAGTTGTATG	98
dhhc4	PY17X_1422600	TCACTGCAATGGGCTCTTTAT	ATGGTGAAGTAAAGGCGTGAA	107
dhhc5	PY17X_1342500	CGTACGAATGCATACGAAACATAAA	CCGGGATTACTTGAAACGACA	96
dhhc6	PY17X_0836700	TCACTGTGACATTGTGCAGATA	TCCAAAGACAATGGTGGTCATA	89
dhhc7	PY17X_1246400	ATGAAGTGTCTGAGAATGGAGATT	ATCCTCGTCACTTCGCTTATTC	89
dhhc8	PY17X_1421400	GGGAGAACGGCTTTCACTAC	TTTGCTTCGTGGCTCCTT	96
dhhc9	PY17X_0934100	ATCCCTATGACATTGGCACTTAT	CAAATTGTCCGGATTGAACGG	92
dhhc10	PY17X_0513100	CCCATGAATGGAGAGTAGAACC	TGAGATCGGTCTGGTTTGTATG	109
dhhc11	PY17X_0313100	AACCAACACATCAGGTATTGAA	TTGCATCAACTGGGATAAGC	122
gapdh	PY17X_1330200	GAGCAGGTAGATCAGCTTTGT	ACTCTAAAGGCAACACCAGTTA	115
Primer for signal peptides in TurboID ligase expression
plasmaid	description	targetting sequence
		Forward Primer		Reverse Primer
Pisp3-BirA*-Cyto	BioID and TurboID ligases expression driven by the promoter of isp3 or isp1 gene	CTAGCATGTACCCTTATGATGTACCAGATTACGCA		CATGGTGCGTAATCTGGTACATCATAAGGGTACAT
Pisp3-Tb-Cyto		CTAGCATGTACCCTTATGATGTACCAGATTACGCA		CATGGTGCGTAATCTGGTACATCATAAGGGTACAT
Pisp3-Tb-IMC		CTAGCATGGGGAATATTGTATCCTGTTGTTCAATAGATGAAACTAAAAAATACGTAAACGATGATC		CATGGATCATCGTTTACGTATTTTTTAGTTTCATCTATTGAACAACAGGATACAATATTCCCCATG
Pisp1-BirA*-Cyto		CTAGCATGTACCCTTATGATGTACCAGATTACGCA		CATGGTGCGTAATCTGGTACATCATAAGGGTACAT
Pisp1-Tb-Cyto		CTAGCATGTACCCTTATGATGTACCAGATTACGCA		CATGGTGCGTAATCTGGTACATCATAAGGGTACAT
Primers for IMC protein candidate overexpression
gene ID	description	Forward Primer		Reverse Primer
PY17X_1440100	glideosome-associated protein 45	CTAGCTAGCATGGGAAGCAGATGTTCAAAAAAT		CGCTCGAGTTAAGCGTAATCTGGAACGTCATATGGATAAGCCAATAATGGGGTATCGGAT
PY17X_0314700	calcium-dependent protein kinase 1	ATTTTCAAACTAGCTAGCATGGGGTGTAATCAAAGTAAGA		AGAACCGGCCCGGAATTCAAATGGTTTATTGTCACAAA
PY17X_1440500	cAMP-dependent protein kinase regulatory subunit	ATTTTCAAACTAGCTAGCATGGGCAATGTGTGCACAT		AGAACCGGCCCGGAATTCGTTTTCTTCAATGCAAGATGA
PY17X_0839000	cAMP-dependent protein kinase catalytic subunit	CTAGCTAGCATGATTCAATTTCTTAAAAATCTACA		CCGGAATTCCCAATCAAAAAACGGATCA
PY17X_0617900	calcium-dependent protein kinase 4	CTAGCTAGCATGGGGCAAGAAATGTCT		CCGGAATTCATAGTTACATAGTTTTATTAACATATCT
PY17X_1420600	Rab11a	CTAGCTAGCATGTCAATGAAAGAGGATTATTAC		CCGGAATTCTCAACAGCATTTTGTTTTTGTTT
PY17X_1462100	myosin A tail domain interacting protein	CTAGCTAGCATGGAACAACAATGCCAC		CCGGAATTCTTGCAATATATCCTCGCAAA
PY17X_0206000	photosensitized INA-labeled protein PHIL1	CTAGCTAGCATGCTTTTTTCAACATCGAG		CCGGAATTCCATATTATCTTTAGGGCATTCT
PY17X_0525300	glideosome associated protein with multiple membrane spans 2	ATTTTCAAACTAGCTAGCATGTATTCATACGGTATGGAAG		AGAACCGGCCCGGAATTCATATTGGCCAATATTATATTTATTTTCA
PY17X_0207400	ATP synthase-associated protein	CTAGCTAGCATGTACAGGAGATATATTTGGAGT		CCGGAATTCAACAAACTGAGCATGCTCAT
PY17X_0312400	RING zinc finger protein	CTAGCTAGCATGGGAATAATAAATTCTACCACAGT		CCGGAATTCTCCCTTTTTGTTATCAACTGCAAT
PY17X_0417300	protein YOP1	CTAGCTAGCATGCGGATGAGTAAATTGTATAAAAAT		CCGGAATTCCACATTTCTTCTTCGAACTCCTT
PY17X_0418000	vacuolar protein sorting-associated protein 46	CTAGCTAGCATGGGTAATAAATTGTCCACAGAAGAT		CCGGAATTCTTTCAAATTTTTGATTCTTTCGCTCAT
PY17X_0812700	P1 nuclease	CTAGCTAGCATGACTATAAATATAAGATGGAGTAGT		CCGGAATTCATTGGATTTATTCTTTAGCTCAACT
PY17X_0917100	aquaglyceroporin	ATTTTCAAAgctagcATGAAAGTAACATTTGGTAATGAAT		AGAACCGGcGAATTCTATTTCTAAAGCGCCTTTATCATG
PY17X_1131200	tetratricopeptide repeat protein	CTAGCTAGCATGGGAGGAACATCAAGTCGAAAT		CCGGAATTCATTTTGGGGTCTCATTTCTATAAGT
PY17X_1139700	Unknown function	CTAGCTAGCATGGATGATATTATTATTAACAAAACA		CCGGAATTCTTTCCATACATCAGCATCAT
PY17X_1220300	pseudo protein kinase 1	ATTTTCAAAgctagcATGGGGATTCTATGTTCGTC		AGAACCGGcGAATTCTATATTGTTGAGTTCGTGAATGGT
PY17X_1348200	Unknown function	ATTTTCAAAgctagcATGGCAGTAAAAAATAAAATGCACAT		AGAACCGGcGAATTCATTTTCTTCGCCATCTGAAAGT
PY17X_1359500	Rab11b	CTAGCTAGCATGTCTAATGAAGAGTATGATCA		CCGGAATTCTCAACAACATTTCATTTGATTAGT
PY17X_1411000	RNA-binding protein	CTAGCTAGCATGGCAATTACAAACTTGT		CCGGAATTCATCATCTTCTTCATCGTTATCAT
PY17X_1441500	Unknown function	CTAGCTAGCATGGATATTTTCAATTGTCATTATTGTT		CCGGAATTCATCATCCAAAGAAATATGTGTCA
PY17X_1453100	vesicle transport v-SNARE protein VTI1	CTAGCTAGCATGTCGGATTCATTATATAATGATTACA		CCGGAATTCTTCTTGGTTTATGGTACTATTATCACT
Oligos for PCR-based site mutagenesis
Mutagenesis site(s)		Description	Forward primer		Reverse primer
dhhc2_C128A		DHHC (125-128 residues) replaced with DHHA	AGATGTGTATTAAATATGGATCATCATgcTCCATGGATAAAT		ATCCAACACAATTATTTATCCATGGAgcATGATGATCCAT
humanized dhhc2_C128A		DHHC (125-128 residues) replaced with DHHA	GAACATGGACCACCACTcCCCTTGGATCA		GCAGTTATTGATCCAAGGGgAGTGGTGGTC
gap45_C5A		GSRCSKN (2-8 residues) replaed with GSRASKN	TTCAAAGCTAGCATGGGAAGCAGAGCTTCAAAAAATAAAGCAAAGGCCC		GGCCTTTGCTTTATTTTTTGAAGCTCTGCTTCCCATGCTAGCTTTG
gap45_C140A		TTPCDMD (137-143 residues) replaed with TTPADMD	ATACATATAAATCTACCACTCCAGCTGATATGGATAAAATGGAT		GTCTCATCCATTTTATCCATATCAGCTGGAGTGGTAGATTTATATGT
gap45_C156A/C158A		SRRCGCDLG (153-161 residues) replaed with SRRAGADLG	TGCCAAGATATTTTCAAGACGAGCTGGAGCTGATCTTGGAGATCGTCAT		CATGACGATCTCCAAGATCAGCTCCAGCTCGTCTTGAAAATATCTTGG
gap45_C169A/C172A		ENACKICRKI (166-175 residues) replaed with ENAAKIARKI	GATCGTCATGACGAAAATGCTGCCAAAATAGCTAGAAAGATTGATTTATCCGAT		GGGGTATCGGATAAATCAATCTTTCTAGCTATTTTGGCAGCATTTTCGTCATGACGAT
cdpk1_C3A		MGCNQS (1-6 residues) replaced with MGANQS	ATTTTCAAAGCTAGCATGGGGGCTAATCAAAGTAAGAGTGC		ATCATTTGCACTCTTACTTTGATTAGCCCCCATGCTAGCTTT
cdpk1_C252A		VWSCGVI (249-255 residues) replaced with VWSAGVI	AATGAAAAATGTGATGTCTGGTCAGCTGGTGTAATTATGTATAT		AATGAAAAATGTGATGTCTGGTCAGCTGGTGTAATTATGTATAT
Oligo for nucleotide substitution of endogenous GAP45 and CDPK1 genes
Modification	Discription		Homologous arm		Target site of sgRNA		site mutation (lower case letter)
			Forward primer	Reverse primer	Oligo (Forward)	Oligo (Reverse )	Forward primer	Reverse primer
CDPK1_C3C	A slient muation in the third amino acid, from Cysteine to Cysteine		CGGGGTACCACATATATGTGCGCATTTACA	CCCCTTAAGTATAGCTTTTTCACTATGCCCA	tattAAGAGTGCAAATGATGTGAG	aaacCTCACATCATTTGCACTCTT	AATTAACATGAAATGGGGTGcAATCAAAGTAAGAGTGCAAAT	TGCACTCTTACTTTGATTgCACCCCATTTCATGTTAATTTA
CDPK1_C3A	A sense muation in the third amino acid, from Cysteine to Alanine		CGGGGTACCACATATATGTGCGCATTTACA	CCCCTTAAGTATAGCTTTTTCACTATGCCCA	tattAAGAGTGCAAATGATGTGAG	aaacCTCACATCATTTGCACTCTT	AATTAACATGAAATGGGGgcTAATCAAAGTAAGAGTGCAAAT	TGCACTCTTACTTTGATTAgcCCCCATTTCATGTTAATTTA
GAP45_C5C	A slient muation in the fifth amino acid, from Cysteine to Cysteine		CGGGGTACCAATATATATTATATATATGGAATGTTA	CCCCTTAAGGATCTCCAAGATCACATCCA	tattAAGCAAAGGCCCCCAAACGT	aaacACGTTTGGGGGCCTTTGCTT	AAAATGGGAAGCAGATGcTCAAAAAATAAAGCAAAGGCC	GGCCTTTGCTTTATTTTTTGAgCATCTGCTTCCCATTTTATAATTT
GAP45_C5A	A sense muation in the fifth amino acid, from Cysteine to Alanine		CGGGGTACCAATATATATTATATATATGGAATGTTA	CCCCTTAAGGATCTCCAAGATCACATCCA	tattAAGCAAAGGCCCCCAAACGT	aaacACGTTTGGGGGCCTTTGCTT	AAAATGGGAAGCAGAgcTTCAAAAAATAAAGCAAAGGCC	GCCTTTGCTTTATTTTTTGAAgcTCTGCTTCCCATTTTATAATTT
