# Supplementary figures and images for: Inner membrane complex proteomics reveals a palmitoylation regulation critical for intraerythrocytic development of malaria parasite
Source: eLife journal article supplement (doi:10.7554/elife.77447), 2022-06-27

A

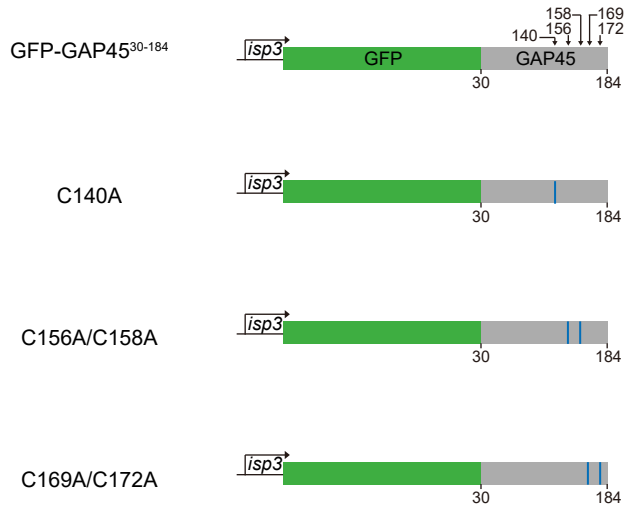

B

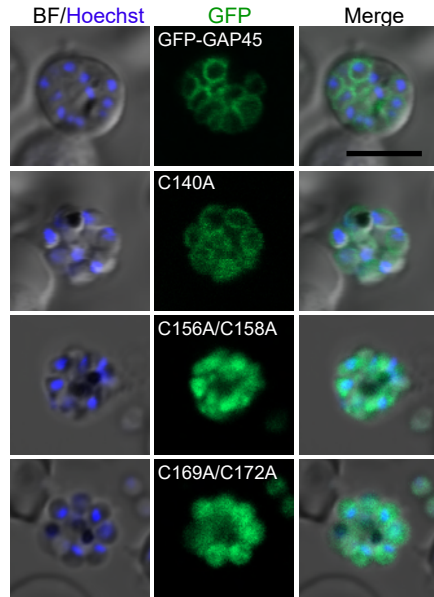

Supplement: supp [file elife-77447-supp-v1.zip]

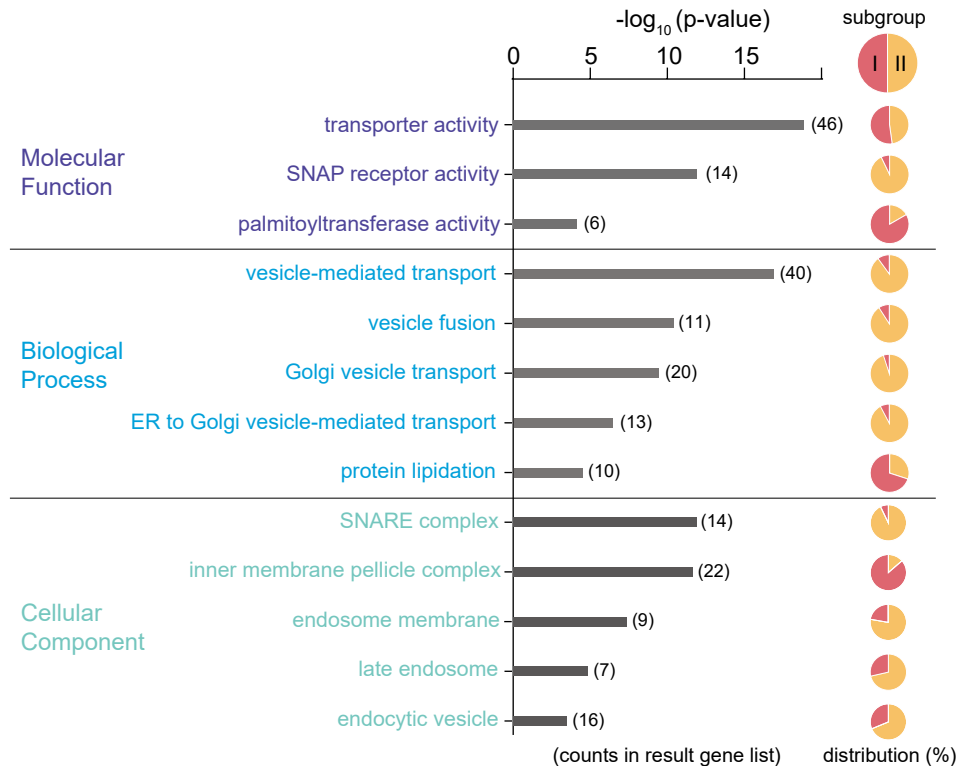

Supplement: supp [file elife-77447-supp-v1.zip]

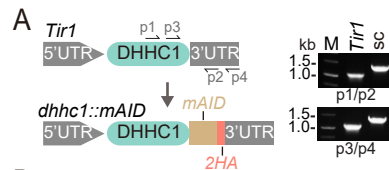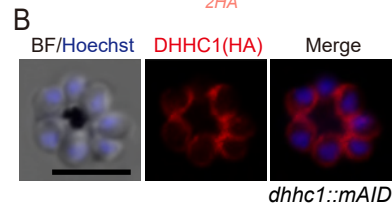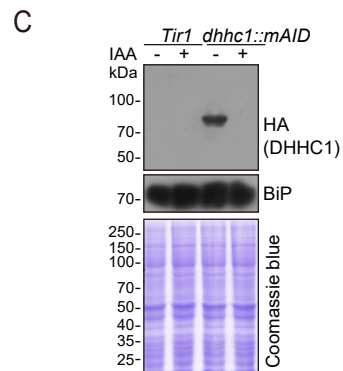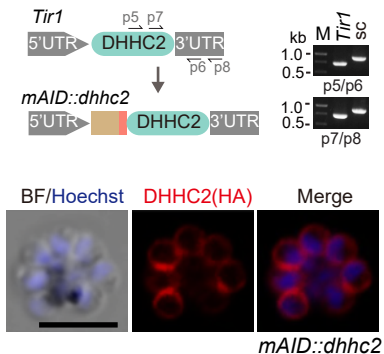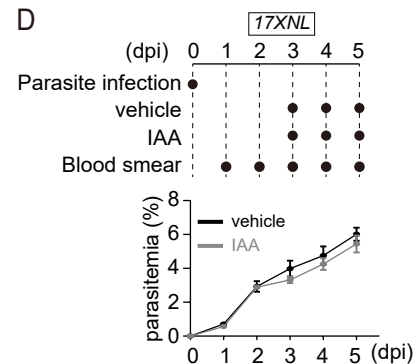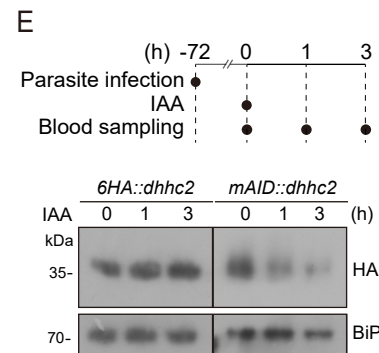

Supplement: supp [file elife-77447-supp-v1.zip]

A

Parental  
parasite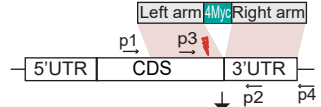Modified  
parasite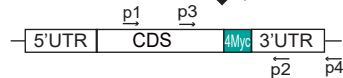

B

*mAID::2HA::dhhc2*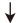*phil1::4Myc;mAID::2HA::dhhc2*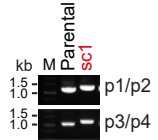

Supplement: supp [file elife-77447-supp-v1.zip]

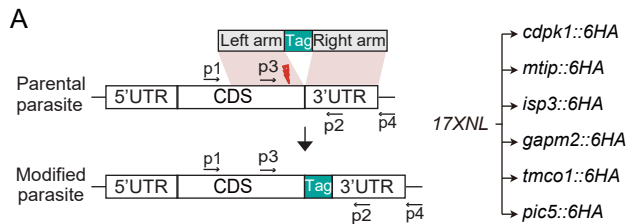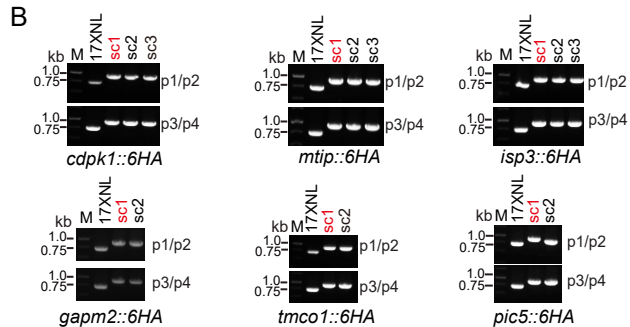

Supplement: supp [file elife-77447-supp-v1.zip]

A

MSP1

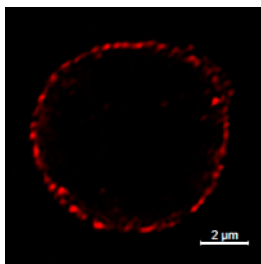

CDPK1

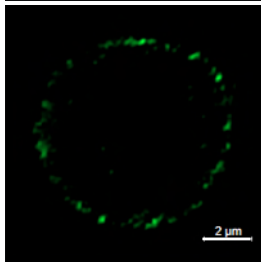

Merge

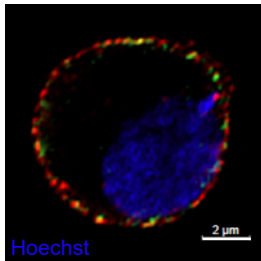*cdpk1::6HA*

B

*wildtype*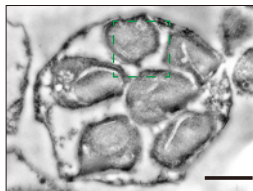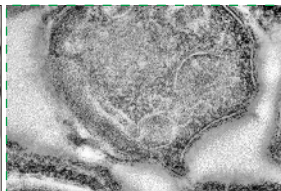*cdpk1::6HA*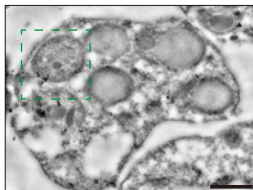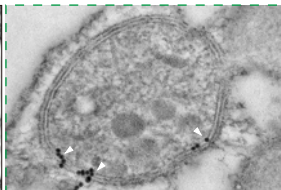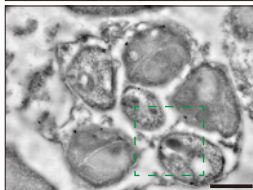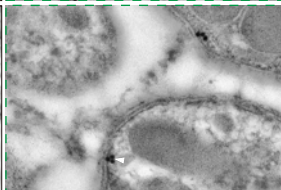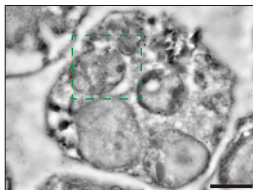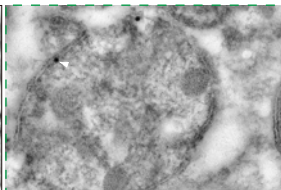

Supplement: supp [file elife-77447-supp-v1.zip]

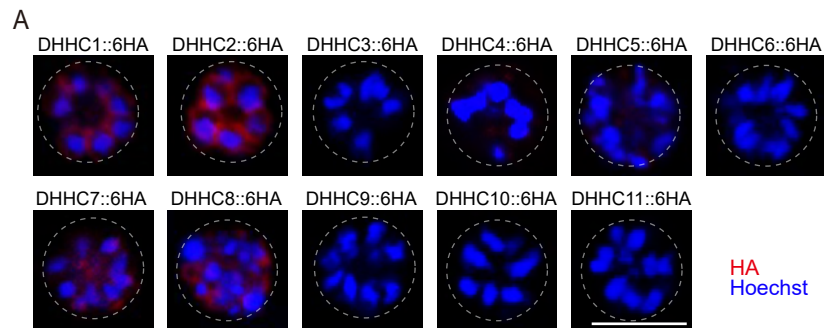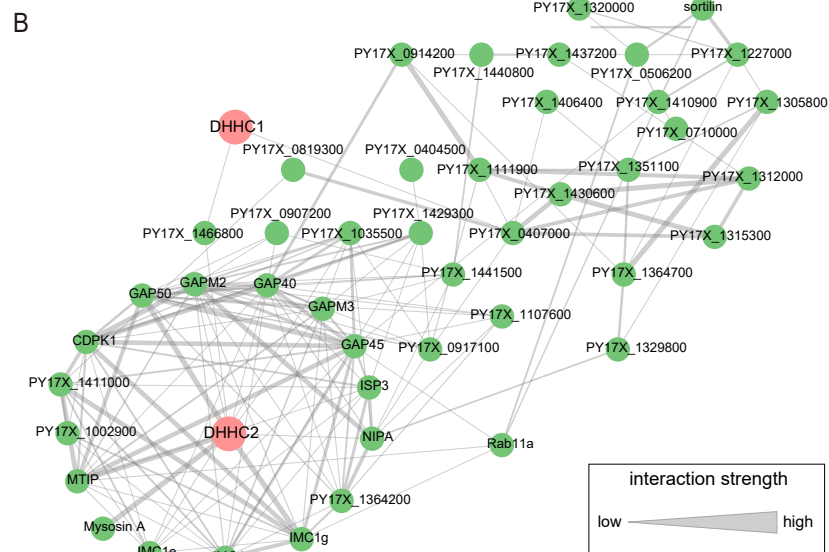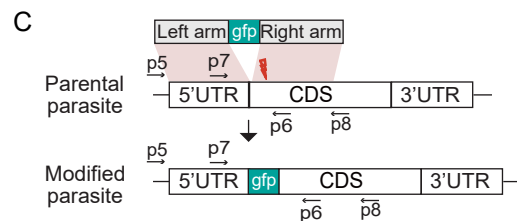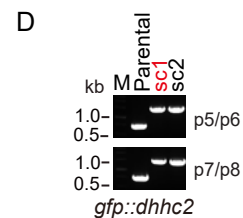

Supplement: supp [file elife-77447-supp-v1.zip]

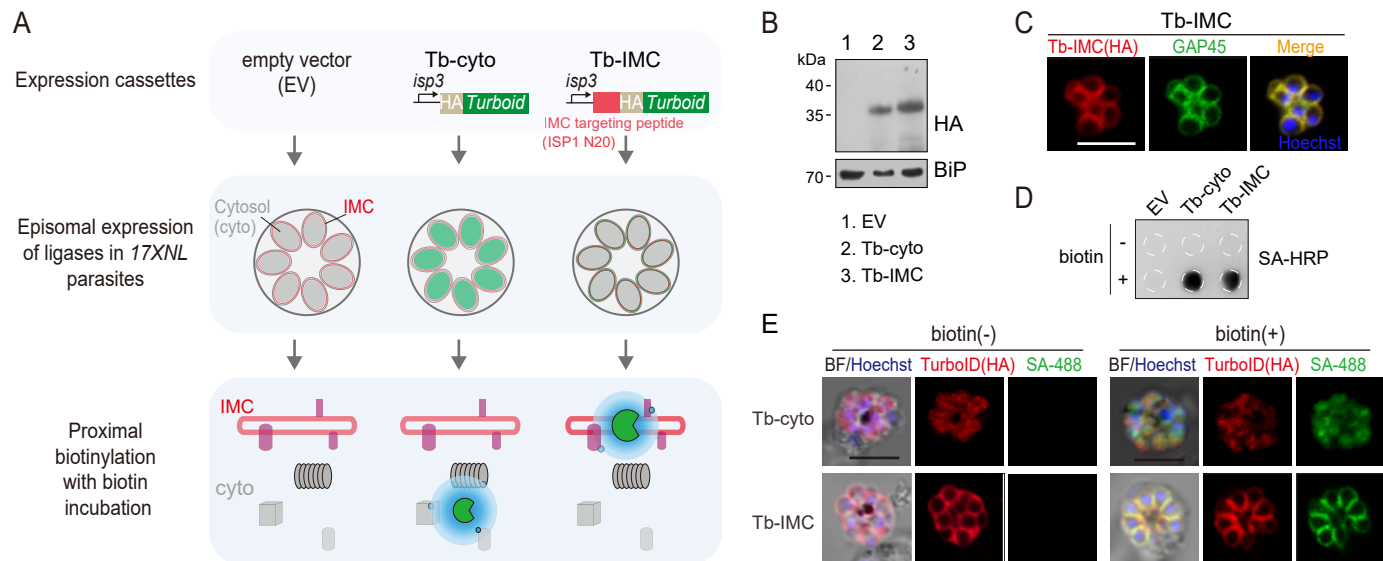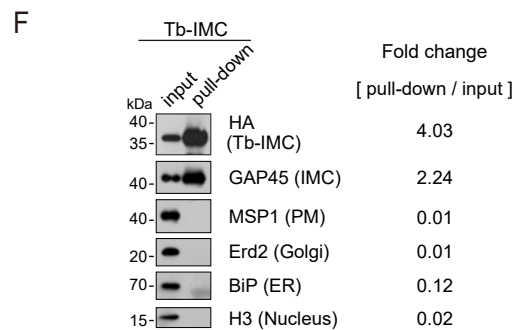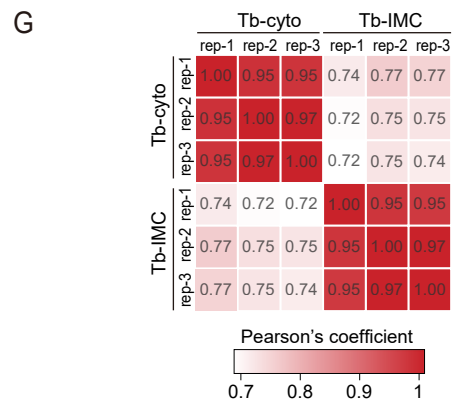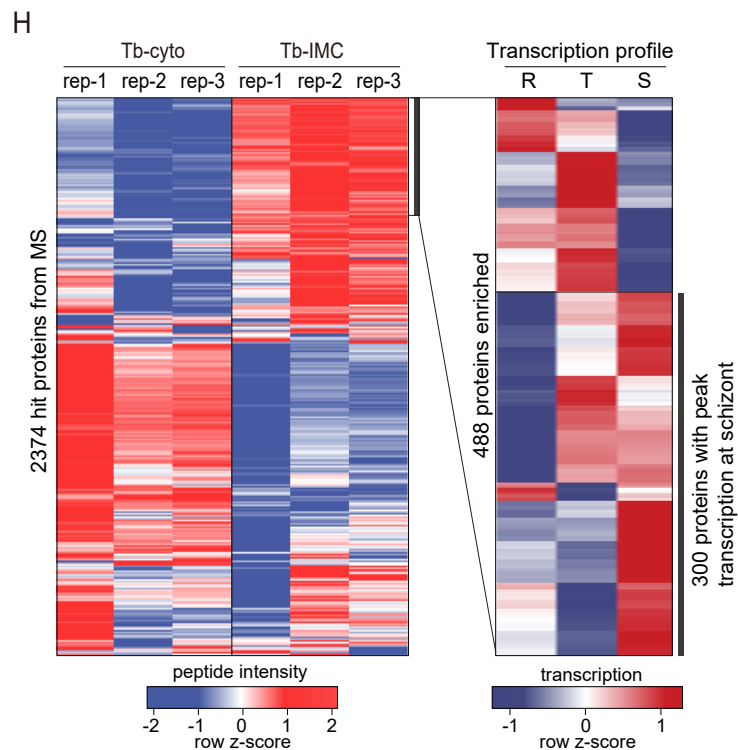

Supplement: supp [file elife-77447-supp-v1.zip]

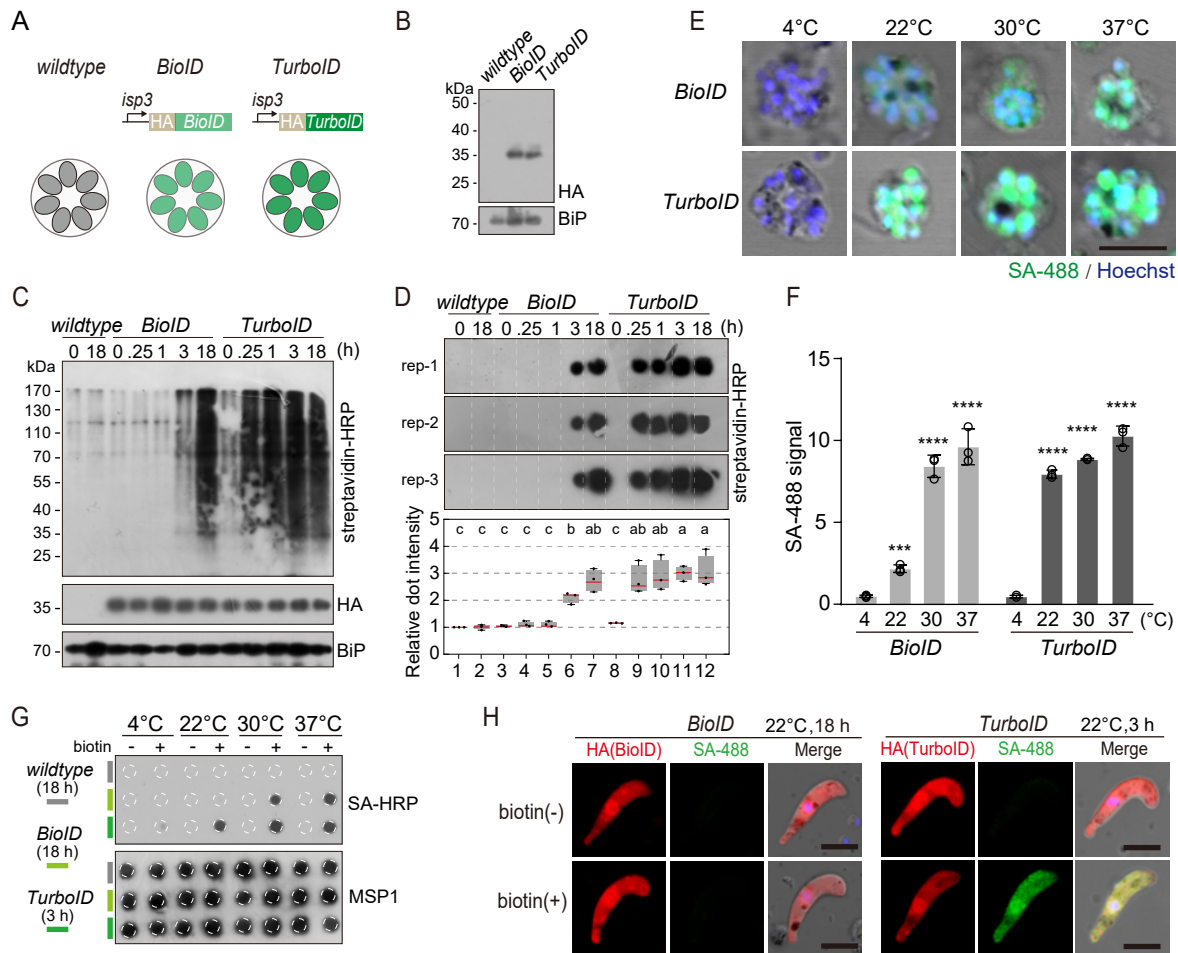

Supplement: supp [file elife-77447-supp-v1.zip]

A

Merozoite invasion *in vivo*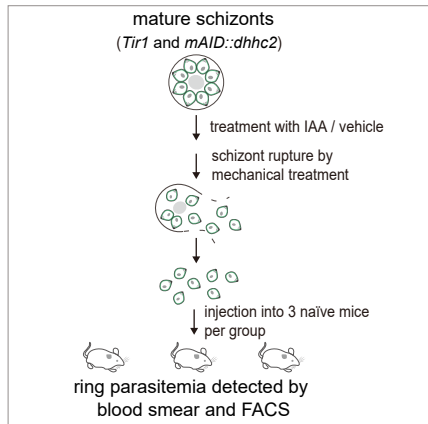

B

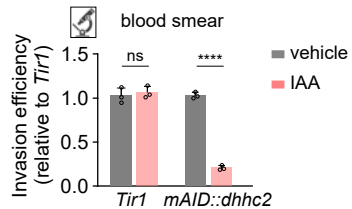

C

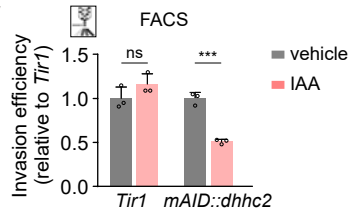

Supplement: supp [file elife-77447-supp-v1.zip]

A

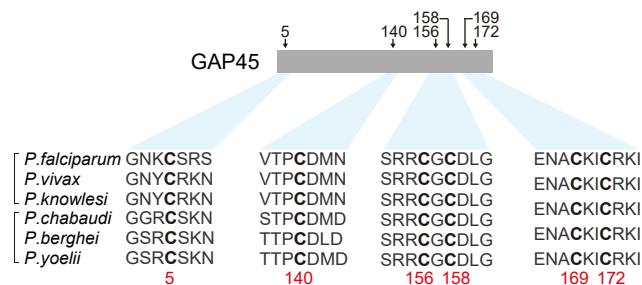

C

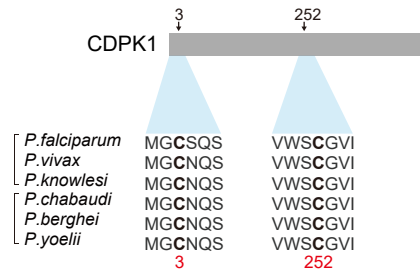

B

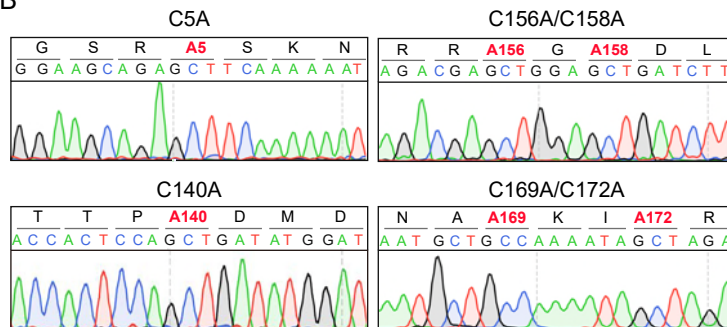

D

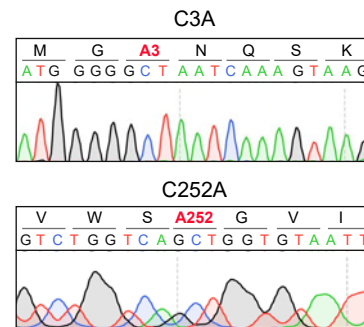

E

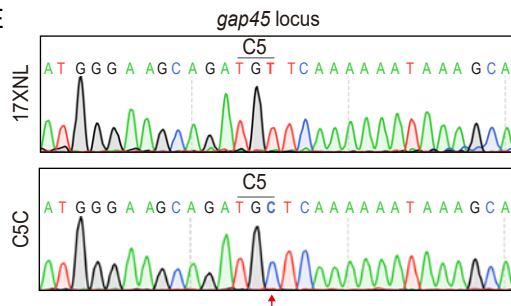

F

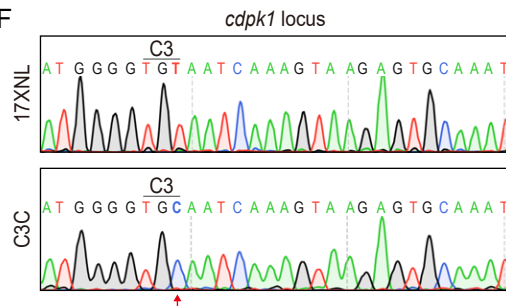

Supplement: supp [file elife-77447-supp-v1.zip]

A

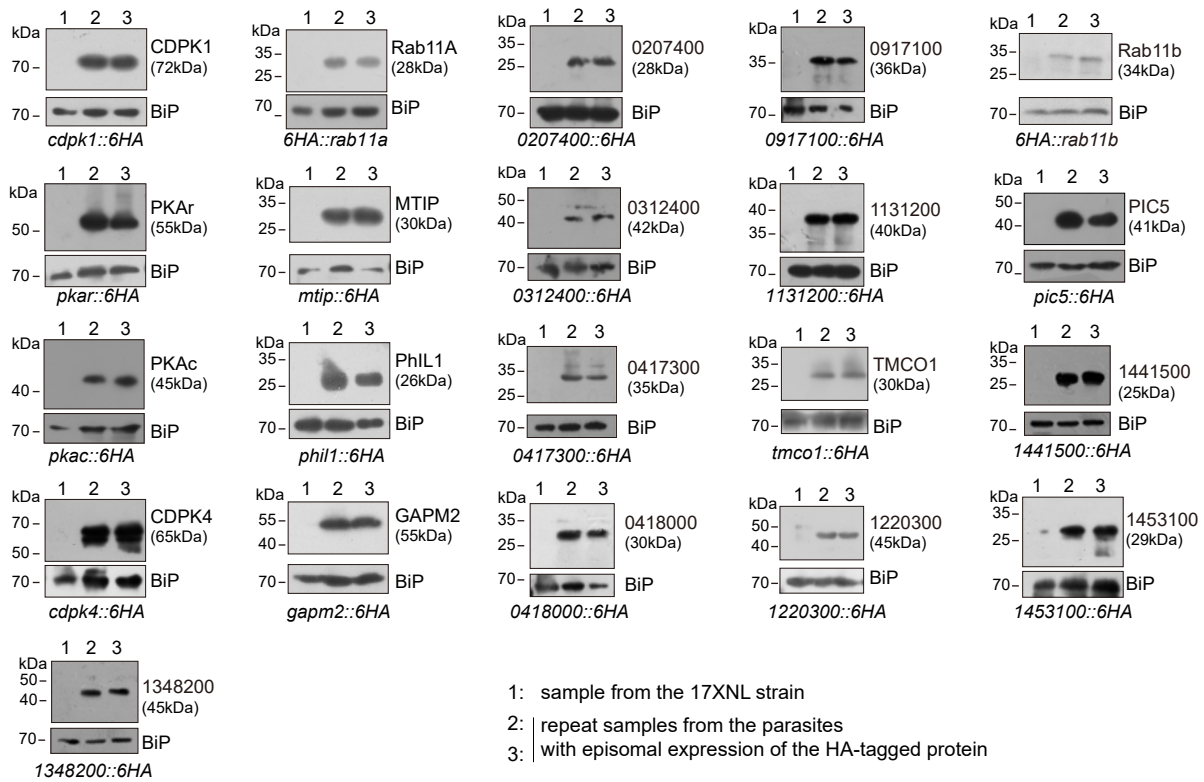

B

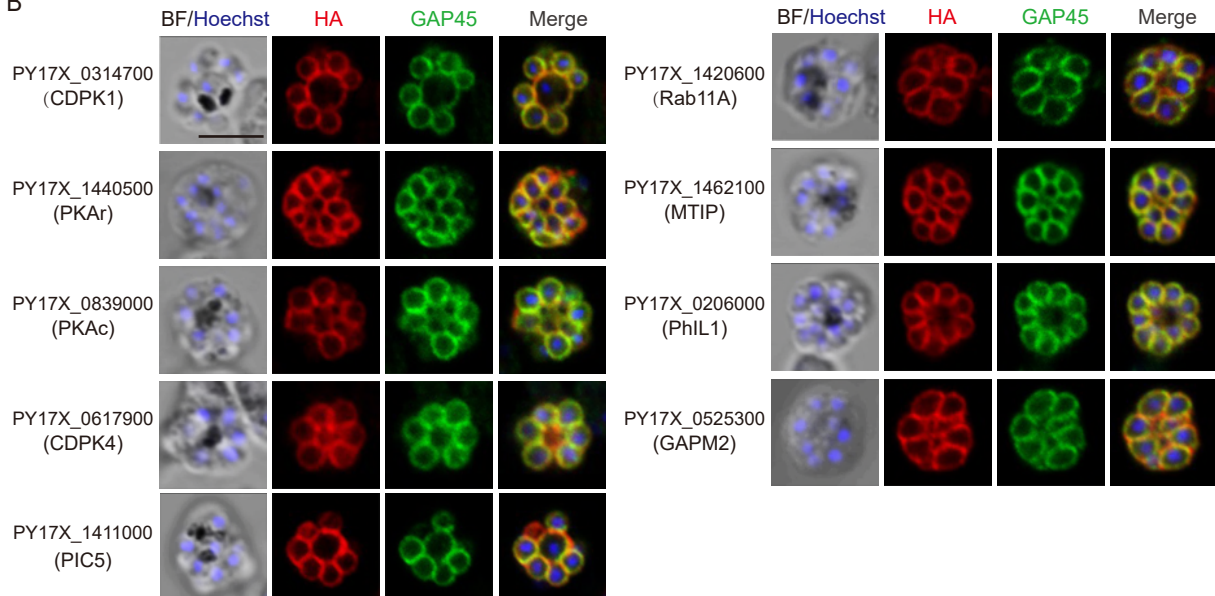

Supplement: supp [file elife-77447-supp-v1.zip]
